# Supplementary material
Source: PubMed Central journal article supplement (PMC4051627)
Supplement: NIHMS581999-supplement-Supplementary_Information.pdf [file NIHMS581999-supplement-Supplementary_Information.pdf]

# Assessing the phenotypic effects in the general population of rare variants in genes for a dominant Mendelian form of diabetes

## Supplementary Information

Jason Flannick\*, Nicola L Beer\*, Alexander G Bick, Vineeta Agarwala, Janne Molnes, Namrata Gupta, Noel P Burt, Jose C Florez, James B Meigs, Herman Taylor, Valeriya Lyssenko, Henrik Irgens, Ervin Fox, Frank Burslem, Stefan Johansson, Jeff K Trimmer, Christopher Newton-Cheh, Tiinamaija Tuomi, Anders Molven, James G Wilson, Christopher O'Donnell, Sekar Kathiresan, Joel Hirschhorn, Pal R. Njølstad, Tim Rolph, J.G. Seidman, Stacey Gabriel, David R Cox, Christine Seidman, Leif Groop, and David Altshuler

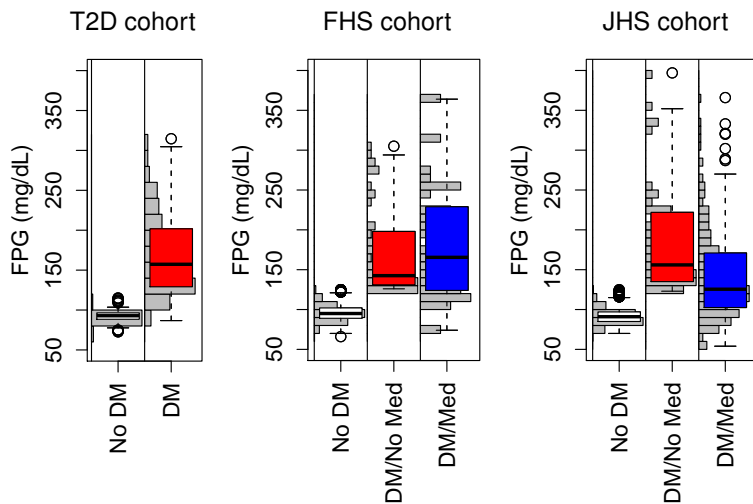

Supplementary Figure 1: **Fasting plasma glucose values for individuals without diabetes, with diabetes minus medication, or with diabetes and receiving medication.** We grouped individuals by diabetes status: without diabetes (No DM, white box), with diabetes but not on glucose-lowering medication (DM/No Med, red box), and on glucose-lowering medication (DM/Med, blue box). The plot shows the distribution of fasting plasma glucose (FPG) values for each group within each cohort; note that these values are impacted by diabetes treatment and are shown for individuals on glucose-lowering medication for completeness only. Medication status was unavailable for the T2D cohort; hence all individuals are labeled as DM.

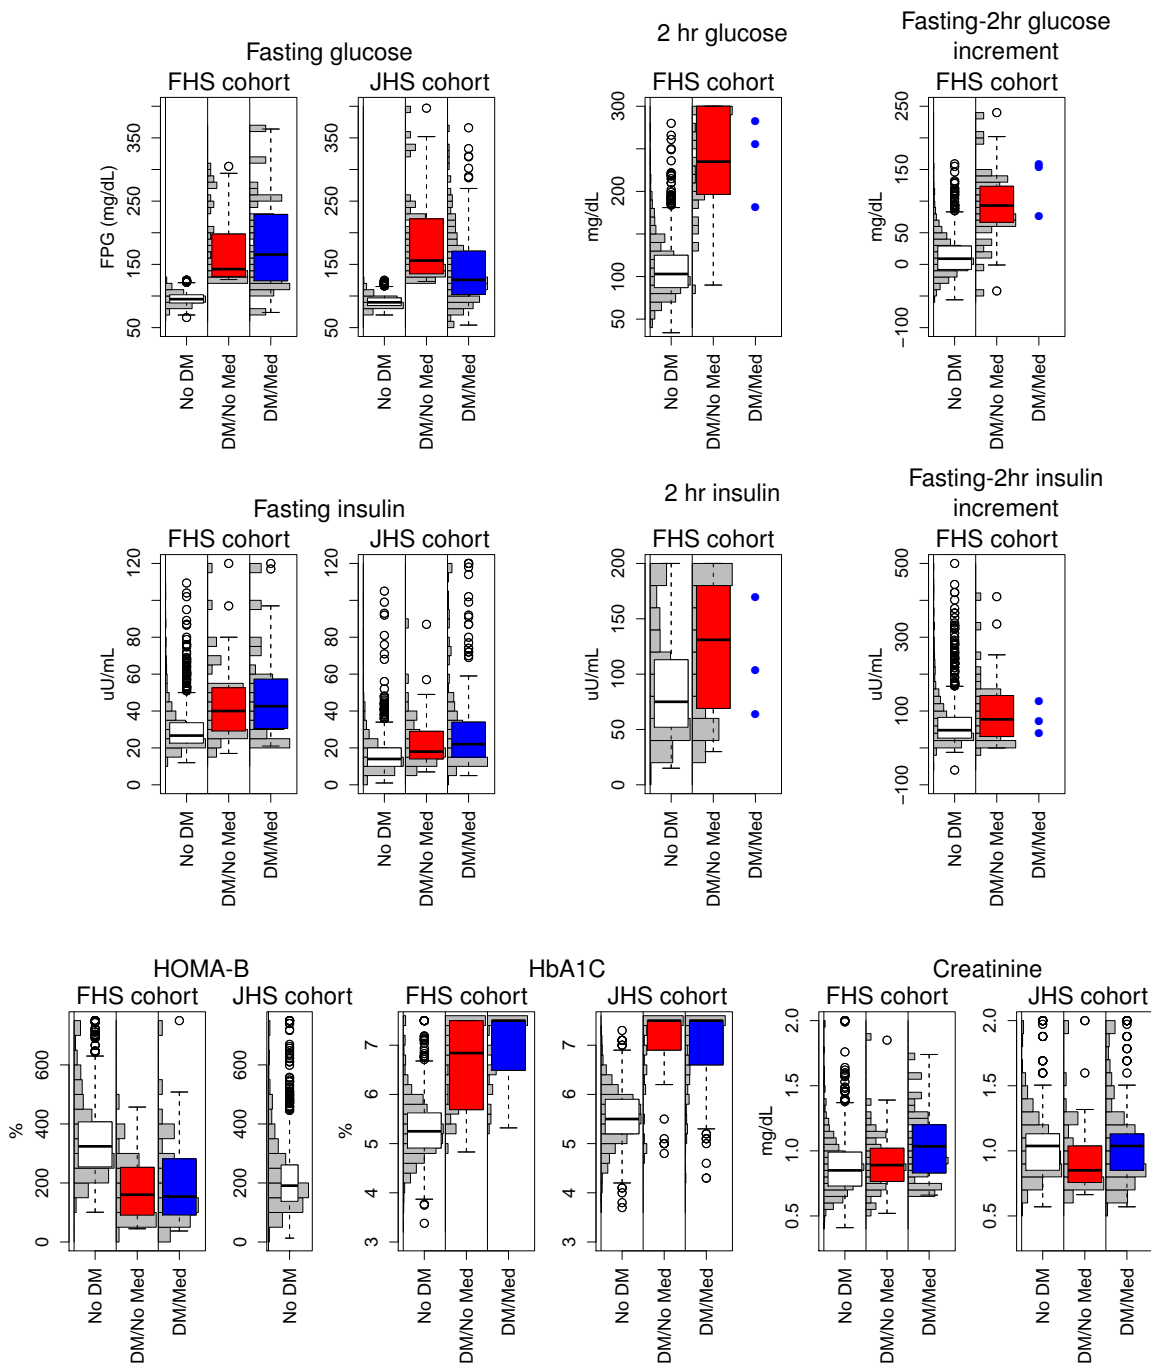

Supplementary Figure 2: **Additional phenotypes of individuals in the phenotypically unselected cohorts.** Plotted are distributions of each trait we examined in the FHS and JHS cohorts, with individuals grouped and colored in the same manner as Supplementary Figure 1. HOMA-B values were unavailable for individuals with diabetes in the JHS.

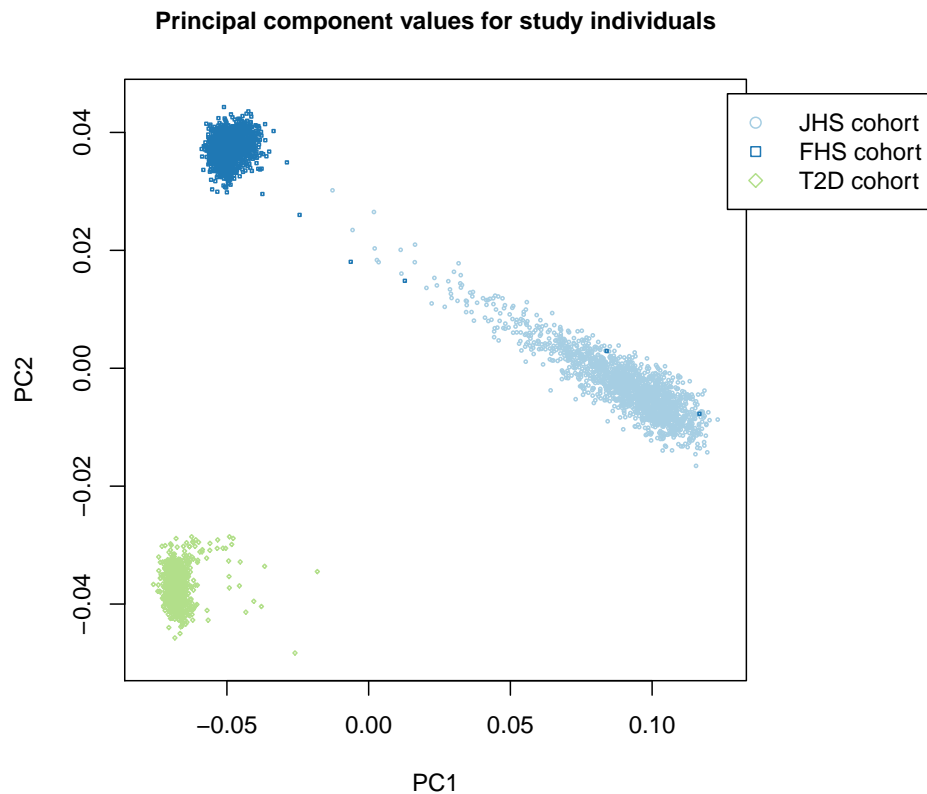

**Supplementary Figure 3: Individual principal component analysis.** To measure the ancestry of each individual, we performed principal component analysis (PCA) using a set of SNPs common to the Affymetrix 500k, Affymetrix 6.0, and the Metabochip. SNPs with MAF <5% or call rate <90% were excluded from analysis, and the remaining SNPs were LD-pruned using the PLINK software package. PCA was performed with the EIGENSTRAT software package. Plotted above are the first (PC1) and second (PC2) principal components for all study individuals, with a point for each individual colored according to cohort membership: green (T2D cohort), dark blue (FHS cohort), light blue (JHS cohort).

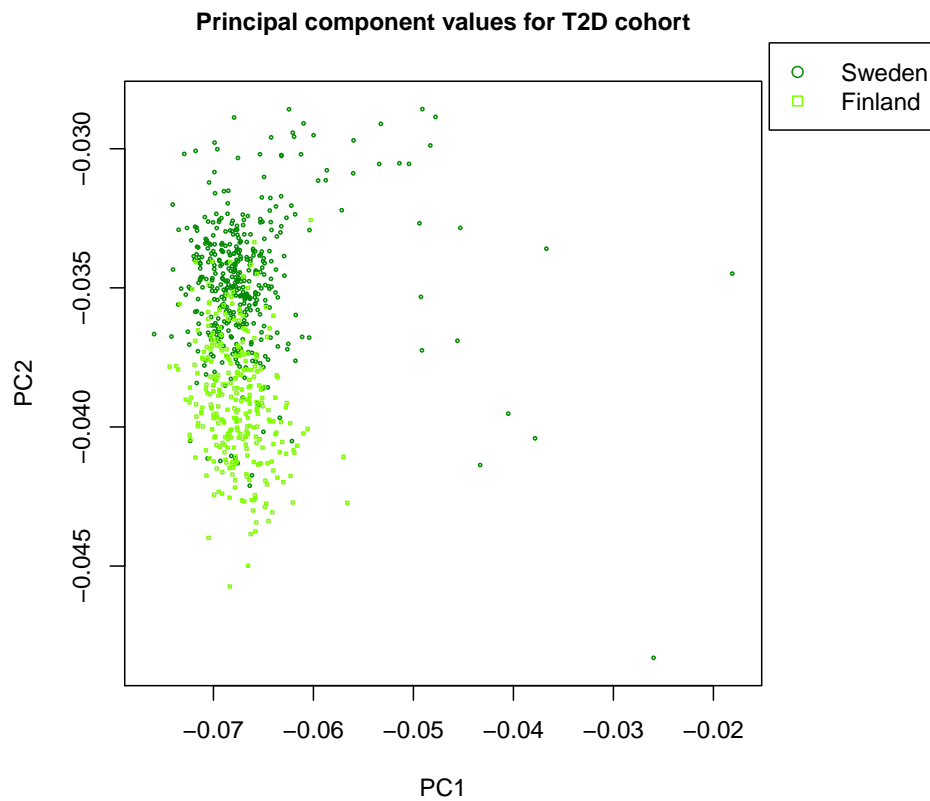

Supplementary Figure 4: **Individual principal component analysis within the T2D cohort.** To measure the ancestry differences between Finnish and Swedish individuals within the T2D cohort, plotted above are the first (PC1) and second (PC2) principal components for these individuals. PCA was performed in an identical manner as that described for Supplementary Figure 3, albeit within only individuals in the T2D cohort. The point for each individual is colored according to country of origin (not necessarily ethnicity): light green (Finland), dark green (Sweden).

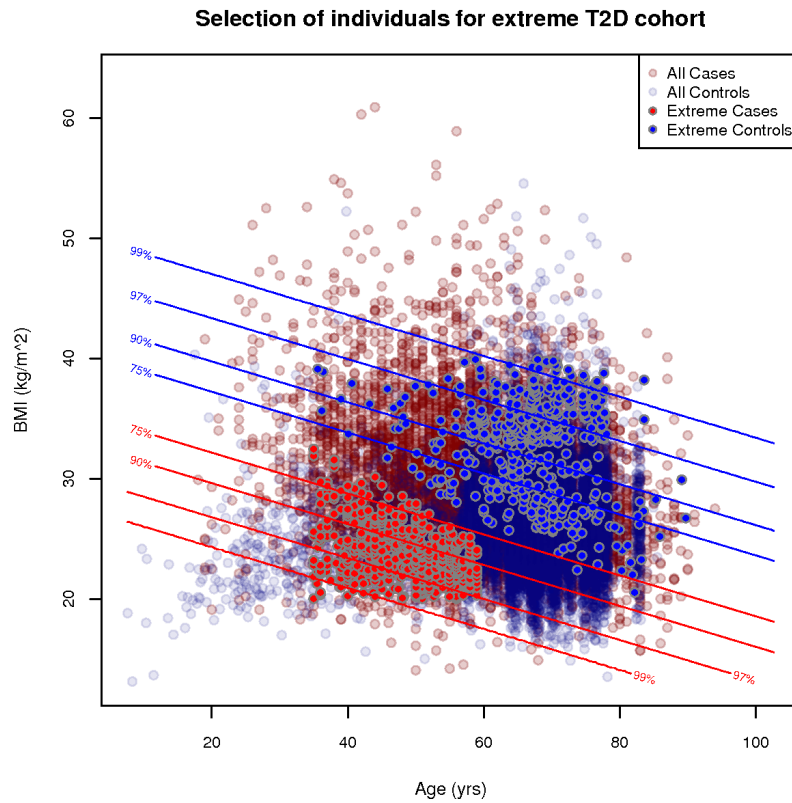

Supplementary Figure 5: **Extreme T2D ascertainment.** We modeled diabetes risk based on age, BMI, and gender (see Methods) within a >27,000 individual population-based cohort. For extreme cases, we selected individuals with T2D but of low age and BMI, and for extreme controls we selected individuals without T2D but of high age and BMI. Individuals from the full population cohort are plotted as pale points in the background. Extreme individuals selected for our study are shown as solid points in the foreground. The lines represent contours of percentile for extremity, computed separately for cases (red) and controls (blue).

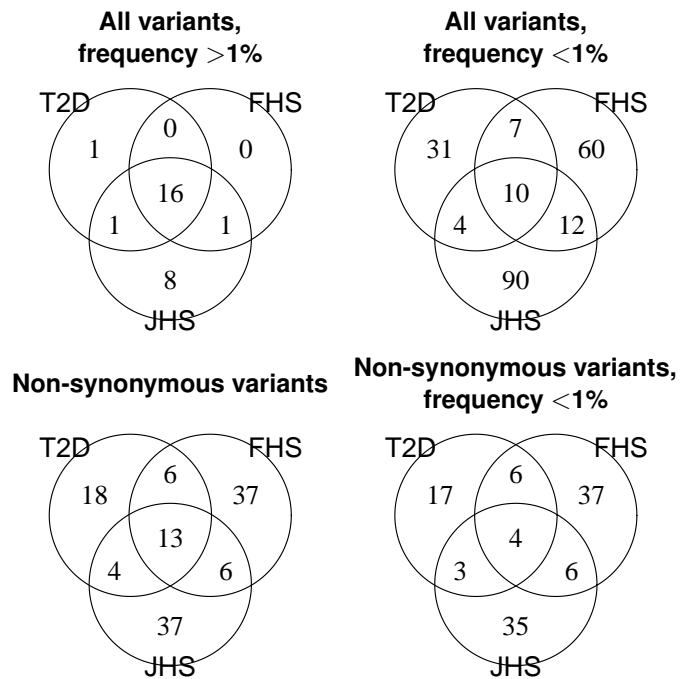

Supplementary Figure 6: **Variant counts by cohort.** The plot shows the variants observed across the three cohorts. Variants are divided into four (overlapping) classes: all variants with MAF >1%, all variants with MAF <1%, non-synonymous variants (any MAF), and non-synonymous variants with MAF <1%. Minor allele frequency is calculated as the maximum over all cohorts; thus, a variant with MAF 2% in the JHS cohort and MAF 0.5% in the FHS cohort would be counted in the class of all variants with MAF >1%. Most variants observed in multiple cohorts are common (MAF >1%), and more variants are private to the JHS cohort (which contains individuals of African-American ancestry) than to the other cohorts.

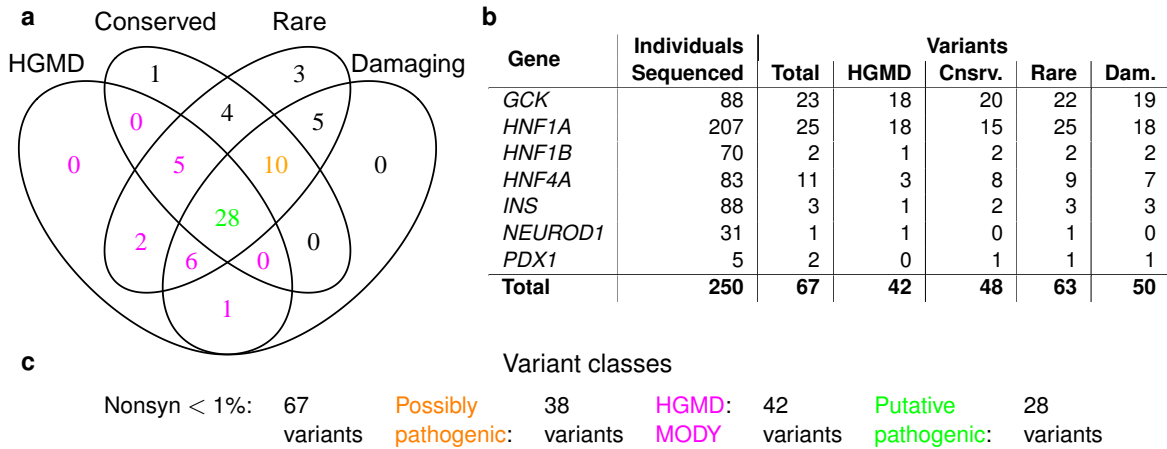

**Supplementary Figure 7: Description of low frequency non-synonymous variants in MODY patients.** We annotated variants observed in MODY patients using the same bioinformatics criteria as for the unselected cohorts. Shown are the low frequency non-synonymous variants that fit each annotation, as well as the counts in each variant class (using the same format as in Figure 1). The number of sequenced individuals is also shown, which varies for each gene as individuals screened for MODY did not have all genes sequenced if a mutation was identified (see Methods).

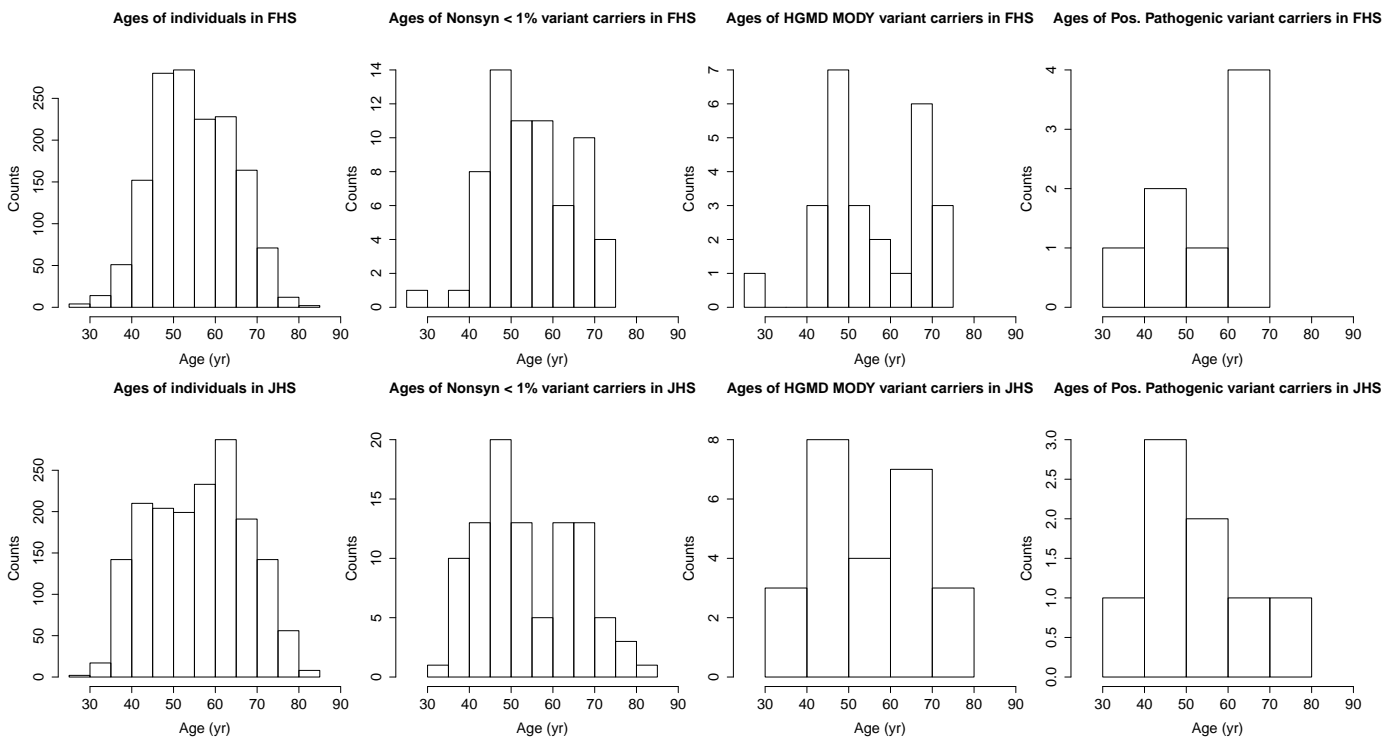

**Supplementary Figure 8: Age distribution of variant carriers.** Shown are the distributions of ages within the FHS and JHS cohorts, as well as those for variant carriers.

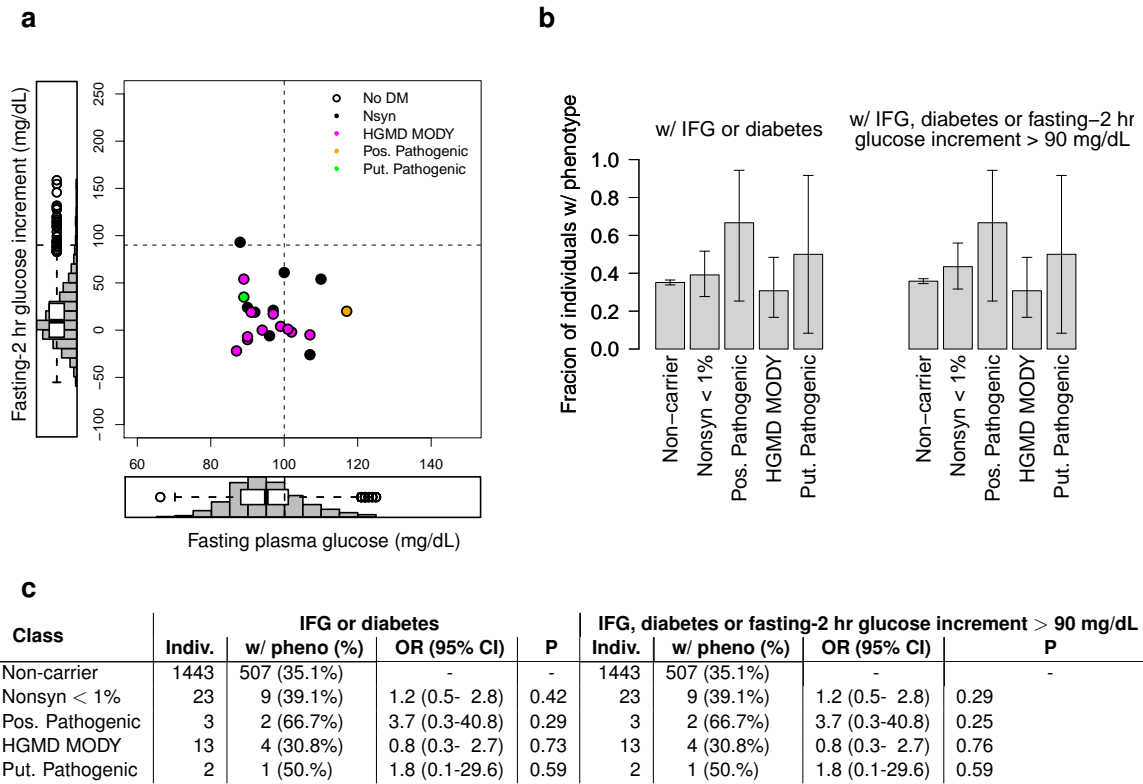

Supplementary Figure 9: **Phenotypes of *HNF1A*-variant carriers in the FHS cohort.** We examined FPG and 2 hr glucose levels (post-OGTT) for *HNF1A*-variant carriers, as *HNF1A*-MODY can present as inappropriately-elevated fasting-2 hr post OGTT increments ( $\geq 90$  mg/dL) despite fasting normoglycemia. **(a)** The scatter plot is a repeat of Figure 3b. **(b)** The bar charts show the fraction of variant carriers with IFG or diabetes (left), as well as the fraction with IFG or fasting-2 hr glucose increments  $\geq 90$ mg/dL (right); the lines give 65% confidence intervals. **(c)** The bottom panel tabulates the data from the bar charts, with additional columns for estimated odds ratios (OR) and p-values from tests of difference between the proportion of variant carriers and non-variant carriers with the relevant phenotype. Data is only shown for individuals from the FHS cohort, as OGTT measurements were unavailable in the JHS cohort.



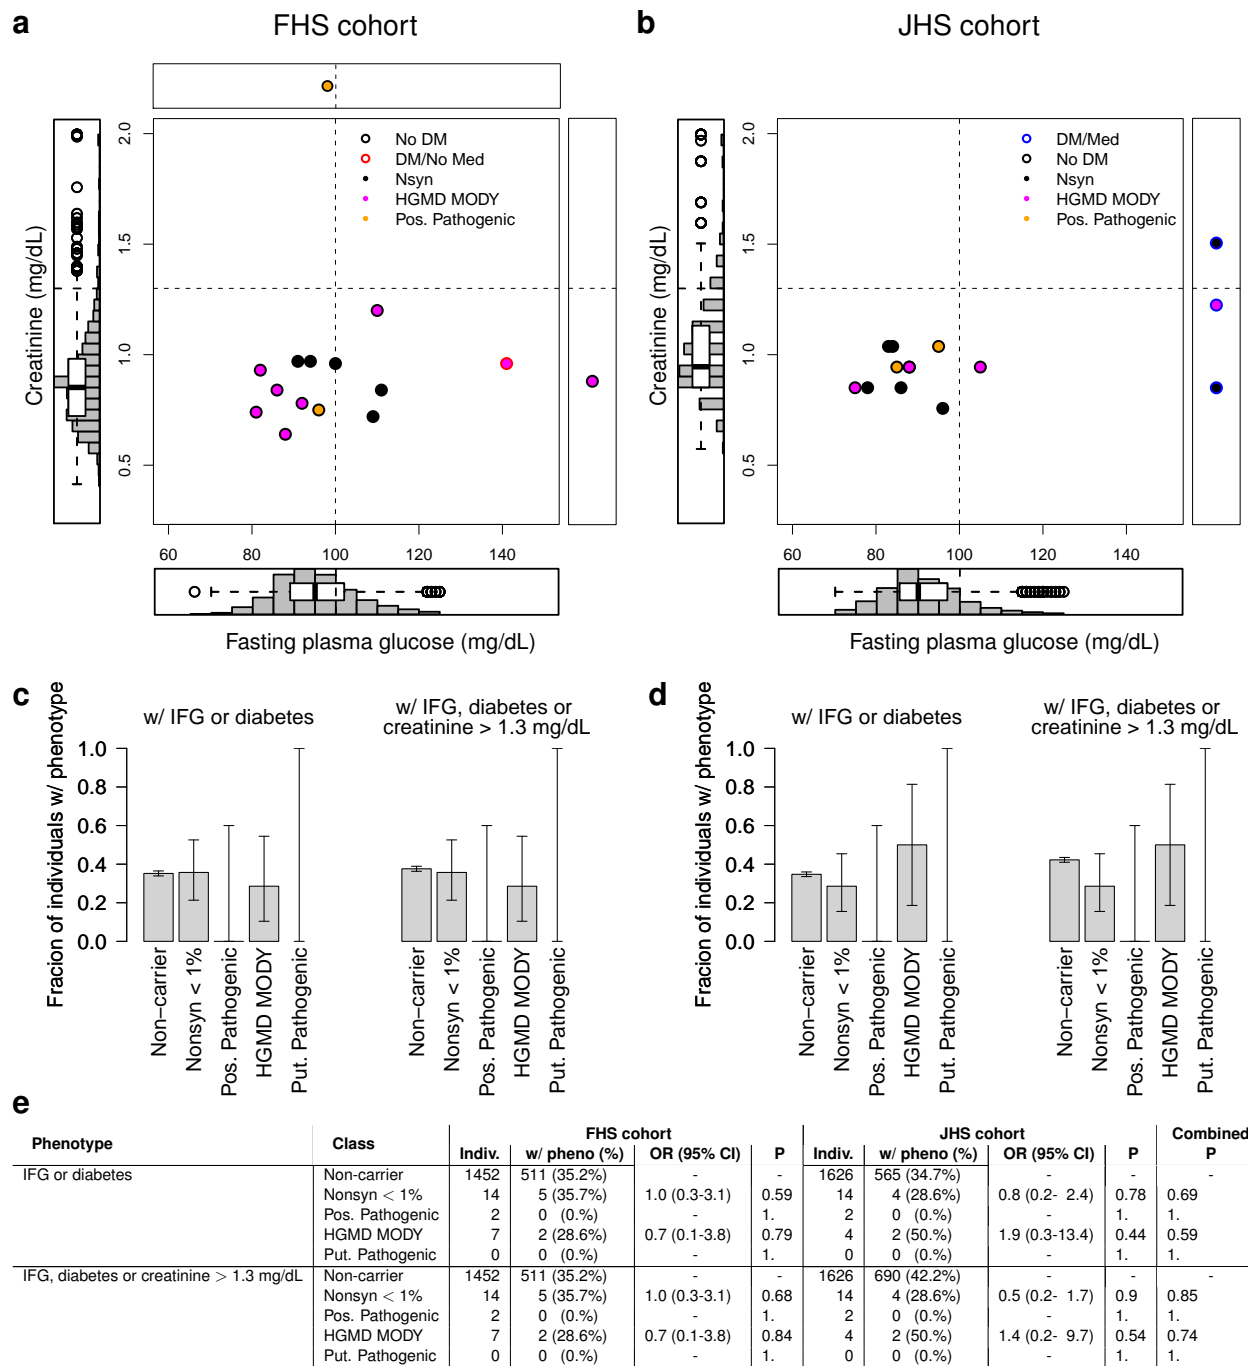

Supplementary Figure 10: **Phenotypes of *HNF1B*-variant carriers in the FHS and JHS cohorts.** Creatinine levels were examined in addition to FPG for *HNF1B*-variant carriers, as *HNF1B*-MODY patients can also experience renal dysfunction. The plot is analogous to Supplementary Figure 9 but with serum creatinine plotted as the additional trait. The horizontal dotted line in the scatter plot represents the upper end of the physiological range for serum creatinine (0.7-1.3mg/dL). Data is shown both for individuals from the FHS (**ace**) and JHS (**bde**) cohorts.

| <b>Gene</b>    | <b>Length (bp)</b> | <b>Bases &gt; 20x (%)</b> | <b>Bases &gt; 10x (%)</b> | <b>Variants</b> |
|----------------|--------------------|---------------------------|---------------------------|-----------------|
| <i>GCK</i>     | 1485               | 92.7%                     | 97.9%                     | 14              |
| <i>HNF1A</i>   | 1893               | 93.0%                     | 98.0%                     | 31              |
| <i>HNF1B</i>   | 1671               | 97.3%                     | 99.3%                     | 18              |
| <i>HNF4A</i>   | 1593               | 97.3%                     | 99.7%                     | 24              |
| <i>INS</i>     | 330                | 79.1%                     | 89.6%                     | 6               |
| <i>NEUROD1</i> | 1068               | 100.0%                    | 100.0%                    | 13              |
| <i>PDX1</i>    | 849                | 37.7%                     | 52.5%                     | 15              |
| <b>Total</b>   | <b>8889</b>        | <b>89.7%</b>              | <b>94.2%</b>              | <b>121</b>      |

Supplementary Table 1: **Sequencing coverage of each gene.** To estimate the power to detect variants private to an individual for each gene, we counted the fraction of bases, averaged across all individuals, sequenced to >10x coverage (the minimum threshold to call a variant) as well as the fraction sequenced to a more stringent >20x coverage. Shown in the table is the targeted length of each gene, the average fraction of bases with coverage >20x and coverage >10x, and the number of identified non-synonymous variants (of any frequency).

| Gene  | Nucleotide change | Amino acid change | Type   | HGMD | SIFT | PPH    | Cons | 1000G | FHS cohort |        | JHS cohort |        | T2D cohort |        |
|-------|-------------------|-------------------|--------|------|------|--------|------|-------|------------|--------|------------|--------|------------|--------|
|       |                   |                   |        |      |      |        |      |       | Count      | Freq   | Count      | Freq   | Count      | Freq   |
| GCK   | c.45+1G>T         | NA                | Splice | Yes  | NA   | NA     | 3.3  | -     | -          | -      | -          | -      | 1          | 0.065% |
| GCK   | c.394G>A          | p.Asp132Asn       | Mis    | Yes  | Tol  | Benign | 2.9  | -     | -          | -      | 1          | 0.029% | -          | -      |
| GCK   | c.1386G>T         | p.Met462Ile       | Mis    | Yes  | Tol  | Benign | 4.0  | -     | 1          | 0.033% | -          | -      | -          | -      |
| GCK   | c.31G>A           | p.Ala11Thr        | Mis    | -    | Tol  | Benign | -0.3 | Yes   | -          | -      | 74         | 2.2%   | -          | -      |
| GCK   | c.39G>T           | p.Lys13Asn        | Mis    | -    | Tol  | Benign | 1.8  | -     | 1          | 0.032% | -          | -      | -          | -      |
| GCK   | c.106C>T          | p.Arg36Trp        | Mis    | -    | Del  | Prob   | 0.8  | -     | -          | -      | -          | -      | 1          | 0.066% |
| GCK   | c.334G>A          | p.Glu112Lys       | Mis    | -    | Tol  | Benign | 3.0  | -     | 1          | 0.032% | -          | -      | -          | -      |
| GCK   | c.385T>C          | p.Cys129Arg       | Mis    | -    | Del  | Prob   | 4.8  | -     | 1          | 0.032% | -          | -      | -          | -      |
| GCK   | c.493C>A          | p.Leu165Ile       | Mis    | -    | Tol  | Benign | 3.1  | -     | -          | -      | -          | -      | 1          | 0.067% |
| GCK   | c.575G>A          | p.Arg192Lys       | Mis    | -    | Tol  | Prob   | 6.2  | -     | -          | -      | 2          | 0.059% | -          | -      |
| GCK   | c.649G>A          | p.Asp217Asn       | Mis    | -    | Tol  | Prob   | 6.3  | -     | 1          | 0.032% | -          | -      | 1          | 0.065% |
| GCK   | c.835G>C          | p.Glu279Gln       | Mis    | -    | Tol  | Pos    | 4.2  | Yes   | -          | -      | 2          | 0.059% | -          | -      |
| GCK   | c.988T>G          | p.Phe330Val       | Mis    | -    | Del  | Pos    | 4.7  | -     | -          | -      | 1          | 0.029% | -          | -      |
| GCK   | c.1025C>G         | p.Thr342Arg       | Mis    | -    | Tol  | Benign | 1.6  | -     | -          | -      | 2          | 0.059% | -          | -      |
| HNF1A | c.92G>A           | p.Gly31Asp        | Mis    | Yes  | Tol  | Pos    | 0.8  | Yes   | 5          | 0.16%  | 1          | 0.029% | 1          | 0.066% |
| HNF1A | c.142G>A          | p.Glu48Lys        | Mis    | Yes  | Tol  | Benign | 1.5  | -     | 1          | 0.032% | -          | -      | -          | -      |
| HNF1A | c.185A>G          | p.Asn62Ser        | Mis    | Yes  | Del  | Benign | 2.1  | -     | 1          | 0.032% | 1          | 0.029% | -          | -      |
| HNF1A | c.392G>A          | p.Arg131Gln       | Mis    | Yes  | Del  | Prob   | 5.7  | -     | -          | -      | -          | -      | 1          | 0.065% |
| HNF1A | c.586A>G          | p.Thr196Ala       | Mis    | Yes  | Del  | Benign | 1.8  | -     | -          | -      | -          | -      | 1          | 0.065% |
| HNF1A | c.827C>G          | p.Ala276Gly       | Mis    | Yes  | Del  | Pos    | 5.5  | -     | 1          | 0.032% | -          | -      | -          | -      |
| HNF1A | c.965A>G          | p.Tyr322Cys       | Mis    | Yes  | Del  | Prob   | 4.2  | -     | -          | -      | 6          | 0.18%  | -          | -      |
| HNF1A | c.1165T>G         | p.Leu389Val       | Mis    | Yes  | Tol  | Pos    | 0.0  | Yes   | -          | -      | 18         | 0.53%  | -          | -      |
| HNF1A | c.1513C>A         | p.His505Asn       | Mis    | Yes  | Tol  | Prob   | 4.6  | -     | 1          | 0.032% | -          | -      | -          | -      |
| HNF1A | c.1522G>A         | p.Glu508Lys       | Mis    | Yes  | Del  | Pos    | 3.9  | -     | 1          | 0.032% | -          | -      | -          | -      |
| HNF1A | c.1544C>A         | p.Thr515Lys       | Mis    | Yes  | Del  | Pos    | 3.8  | -     | -          | -      | 1          | 0.029% | -          | -      |
| HNF1A | c.1748G>A         | p.Arg583Gln       | Mis    | Yes  | Del  | Benign | 1.4  | -     | 4          | 0.14%  | -          | -      | -          | -      |
| HNF1A | c.79A>C           | p.Ile27Leu        | Mis    | -    | Del  | Benign | 1.6  | Yes   | 1101       | 35%    | 413        | 12%    | 536        | 35%    |
| HNF1A | c.290C>T          | p.Ala97Val        | Mis    | -    | Del  | Pos    | 3.3  | -     | -          | -      | 1          | 0.029% | -          | -      |
| HNF1A | c.293C>T          | p.Ala98Val        | Mis    | -    | Del  | Benign | 5.0  | Yes   | 62         | 2%     | 20         | 0.59%  | 53         | 3.5%   |
| HNF1A | c.298C>A          | p.Gln100Lys       | Mis    | -    | Del  | Benign | 5.0  | -     | -          | -      | 1          | 0.029% | -          | -      |
| HNF1A | c.307G>A          | p.Val103Met       | Mis    | -    | Tol  | Pos    | 5.0  | -     | 1          | 0.033% | -          | -      | -          | -      |
| HNF1A | c.341G>A          | p.Arg114His       | Mis    | -    | Tol  | Benign | 2.1  | -     | -          | -      | 1          | 0.029% | 1          | 0.065% |
| HNF1A | c.533C>T          | p.Thr178Ile       | Mis    | -    | Del  | Benign | 1.1  | -     | 1          | 0.032% | -          | -      | -          | -      |
| HNF1A | c.818_820delAAG   | p.Glu274del       | Del    | -    | NA   | NA     | 4.6  | -     | 1          | 0.032% | -          | -      | -          | -      |
| HNF1A | c.824A>C          | p.Glu275Ala       | Mis    | -    | Del  | Prob   | 4.6  | Yes   | 1          | 0.032% | -          | -      | -          | -      |
| HNF1A | c.854C>T          | p.Thr285Met       | Mis    | -    | Del  | Benign | 3.8  | -     | 1          | 0.032% | -          | -      | -          | -      |
| HNF1A | c.1360A>G         | p.Ser454Gly       | Mis    | -    | Tol  | Benign | 3.1  | -     | -          | -      | -          | -      | 1          | 0.067% |
| HNF1A | c.1405C>T         | p.His469Tyr       | Mis    | -    | Del  | Prob   | 3.6  | -     | 2          | 0.065% | 1          | 0.029% | -          | -      |
| HNF1A | c.1460G>A         | p.Ser487Asn       | Mis    | -    | Tol  | Benign | 0.9  | Yes   | 1038       | 34%    | 426        | 13%    | 476        | 32%    |
| HNF1A | c.1469T>C         | p.Met490Thr       | Mis    | -    | Del  | Prob   | 4.5  | -     | -          | -      | -          | -      | 1          | 0.068% |
| HNF1A | c.1532A>G         | p.Gln511Arg       | Mis    | -    | Del  | Prob   | 4.7  | -     | 1          | 0.032% | -          | -      | -          | -      |
| HNF1A | c.1541A>G         | p.His514Arg       | Mis    | -    | Del  | Pos    | 1.4  | -     | 1          | 0.032% | -          | -      | -          | -      |
| HNF1A | c.1696C>A         | p.His566Asn       | Mis    | -    | Del  | Benign | 3.1  | -     | -          | -      | 1          | 0.029% | -          | -      |
| HNF1A | c.1720A>G         | p.Ser574Gly       | Mis    | -    | Tol  | Benign | 0.1  | Yes   | -          | -      | 170        | 5%     | -          | -      |
| HNF1A | c.1729C>G         | p.His577Asp       | Mis    | -    | Del  | Benign | 2.2  | -     | 1          | 0.035% | -          | -      | -          | -      |
| HNF1B | c.182T>G          | p.Val61Gly        | Mis    | Yes  | Tol  | Benign | 2.8  | -     | 3          | 0.097% | -          | -      | 1          | 0.068% |
| HNF1B | c.226G>T          | p.Gly76Cys        | Mis    | Yes  | Del  | Prob   | 5.7  | Yes   | 3          | 0.097% | 3          | 0.088% | 2          | 0.14%  |
| HNF1B | c.1108G>A         | p.Gly370Ser       | Mis    | Yes  | Tol  | Benign | 2.6  | Yes   | -          | -      | 1          | 0.029% | -          | -      |
| HNF1B | c.1474G>A         | p.Gly492Ser       | Mis    | Yes  | Tol  | Prob   | 1.7  | Yes   | 2          | 0.064% | -          | -      | 7          | 0.47%  |
| HNF1B | c.35T>G           | p.Leu12Arg        | Mis    | -    | Del  | Prob   | 4.9  | -     | 1          | 0.032% | -          | -      | -          | -      |
| HNF1B | c.127C>G          | p.Leu43Val        | Mis    | -    | Tol  | Benign | 1.6  | -     | -          | -      | 2          | 0.059% | -          | -      |
| HNF1B | c.145T>A          | p.Ser49Thr        | Mis    | -    | Tol  | Benign | 2.3  | -     | 1          | 0.032% | -          | -      | -          | -      |
| HNF1B | c.244G>A          | p.Asp82Asn        | Mis    | -    | Del  | Pos    | 5.7  | -     | 2          | 0.065% | 2          | 0.059% | -          | -      |
| HNF1B | c.335G>A          | p.Arg112Gln       | Mis    | -    | Tol  | Benign | 3.1  | -     | 1          | 0.034% | -          | -      | 1          | 0.072% |
| HNF1B | c.684C>G          | p.Asn228Lys       | Mis    | -    | Tol  | Benign | 3.7  | -     | -          | -      | 3          | 0.088% | -          | -      |
| HNF1B | c.905A>G          | p.Asn302Ser       | Mis    | -    | Del  | Benign | 4.7  | -     | -          | -      | -          | -      | 1          | 0.065% |
| HNF1B | c.944T>C          | p.Met315Thr       | Mis    | -    | Del  | Benign | 3.1  | -     | 1          | 0.032% | -          | -      | -          | -      |
| HNF1B | c.953A>G          | p.Tyr318Cys       | Mis    | -    | Del  | Prob   | 3.0  | -     | -          | -      | 1          | 0.029% | -          | -      |
| HNF1B | c.1561dupC        | p.Gln521ArgfsX30  | Frame  | -    | NA   | NA     | 5.1  | -     | -          | -      | -          | -      | 31         | 2.1%   |
| HNF1B | c.1594A>G         | p.Met532Val       | Mis    | -    | Del  | Prob   | 5.0  | -     | 1          | 0.032% | -          | -      | -          | -      |
| HNF1B | c.1598T>C         | p.Val533Ala       | Mis    | -    | Del  | Prob   | 5.0  | -     | -          | -      | 1          | 0.029% | -          | -      |
| HNF1B | c.1621A>C         | p.Ser541Arg       | Mis    | -    | Del  | Benign | 3.1  | -     | -          | -      | -          | -      | 1          | 0.065% |
| HNF1B | c.1657C>A         | p.Pro553Thr       | Mis    | -    | Del  | Benign | 3.8  | -     | -          | -      | 1          | 0.029% | -          | -      |
| HNF4A | c.406C>T          | p.Arg136Trp       | Mis    | Yes  | Del  | Prob   | 1.2  | -     | 1          | 0.032% | -          | -      | -          | -      |
| HNF4A | c.488G>A          | p.Arg163Gln       | Mis    | Yes  | Tol  | Benign | 2.5  | -     | -          | -      | -          | -      | 1          | 0.065% |
| HNF4A | c.790G>A          | p.Val264Met       | Mis    | Yes  | Del  | Prob   | 6.0  | -     | 1          | 0.032% | -          | -      | -          | -      |
| HNF4A | c.929G>A          | p.Arg310Gln       | Mis    | Yes  | Tol  | Benign | 3.3  | -     | 1          | 0.032% | -          | -      | -          | -      |
| HNF4A | c.1193T>C         | p.Met398Thr       | Mis    | Yes  | Tol  | Benign | 5.2  | Yes   | 1          | 0.032% | -          | -      | -          | -      |
| HNF4A | c.1333C>T         | p.Pro445Ser       | Mis    | Yes  | Tol  | Benign | 3.9  | -     | -          | -      | -          | -      | 1          | 0.065% |
| HNF4A | c.134G>A          | p.Gly45Asp        | Mis    | -    | Tol  | Benign | 1.9  | -     | -          | -      | 1          | 0.029% | -          | -      |
| HNF4A | c.152C>A          | p.Pro51His        | Mis    | -    | Del  | Benign | 4.1  | -     | -          | -      | 1          | 0.029% | -          | -      |
| HNF4A | c.299G>A          | p.Arg100Gln       | Mis    | -    | Del  | Prob   | 6.1  | -     | -          | -      | 1          | 0.029% | -          | -      |

|                |                 |                   |       |   |     |         |      |     |      |        |     |        |     |        |
|----------------|-----------------|-------------------|-------|---|-----|---------|------|-----|------|--------|-----|--------|-----|--------|
| <i>HNF4A</i>   | c.365G>T        | p.Arg122Leu       | Mis   | - | Del | Prob    | 6.2  | -   | -    | -      | -   | -      | 1   | 0.065% |
| <i>HNF4A</i>   | c.416C>T        | p.Thr139Ile       | Mis   | - | Tol | Benign  | 5.9  | Yes | 92   | 2.9%   | 24  | 0.71%  | 72  | 4.7%   |
| <i>HNF4A</i>   | c.427A>G        | p.Ser143Gly       | Mis   | - | Tol | Benign  | 4.9  | -   | 1    | 0.032% | -   | -      | -   | -      |
| <i>HNF4A</i>   | c.505G>A        | p.Val169Ile       | Mis   | - | Tol | Benign  | -0.1 | Yes | -    | -      | 2   | 0.059% | -   | -      |
| <i>HNF4A</i>   | c.530G>A        | p.Arg177Gln       | Mis   | - | Tol | Benign  | 3.5  | -   | -    | -      | 1   | 0.029% | -   | -      |
| <i>HNF4A</i>   | c.655C>A        | p.Leu219Met       | Mis   | - | Del | Prob    | 1.6  | -   | -    | -      | -   | -      | 1   | 0.065% |
| <i>HNF4A</i>   | c.748A>G        | p.Ile250Val       | Mis   | - | Tol | Benign  | 2.5  | -   | -    | -      | 1   | 0.029% | -   | -      |
| <i>HNF4A</i>   | c.928C>T        | p.Arg310Trp       | Mis   | - | Del | Prob    | 1.1  | -   | 1    | 0.032% | -   | -      | -   | -      |
| <i>HNF4A</i>   | c.1103A>G       | p.Asn368Ser       | Mis   | - | Tol | Benign  | 1.2  | -   | 1    | 0.032% | -   | -      | -   | -      |
| <i>HNF4A</i>   | c.1161C>A       | p.His387Gln       | Mis   | - | Tol | Pos     | 1.6  | -   | -    | -      | 1   | 0.029% | -   | -      |
| <i>HNF4A</i>   | c.1210G>A       | p.Val404Ile       | Mis   | - | Tol | Benign  | 4.6  | -   | -    | -      | -   | -      | 1   | 0.065% |
| <i>HNF4A</i>   | c.1250T>C       | p.Met417Thr       | Mis   | - | Tol | Benign  | 5.2  | -   | 1    | 0.032% | -   | -      | -   | -      |
| <i>HNF4A</i>   | c.1360G>A       | p.Ala454Thr       | Mis   | - | Tol | Benign  | -0.3 | -   | -    | -      | -   | -      | 1   | 0.065% |
| <i>HNF4A</i>   | c.1369G>C       | p.Val457Leu       | Mis   | - | Tol | Benign  | 1.5  | -   | -    | -      | 1   | 0.029% | -   | -      |
| <i>HNF4A</i>   | c.1387A>G       | p.Ile463Val       | Mis   | - | Del | Benign  | 4.6  | -   | 1    | 0.032% | -   | -      | 1   | 0.065% |
| <i>INS</i>     | c.17G>A         | p.Arg6His         | Mis   | - | Tol | Unknown | 0.0  | -   | 1    | 0.032% | 2   | 0.059% | 2   | 0.28%  |
| <i>INS</i>     | c.67G>T         | p.Ala23Ser        | Mis   | - | Tol | Unknown | -0.1 | Yes | 1    | 0.032% | 1   | 0.029% | -   | -      |
| <i>INS</i>     | c.208G>A        | p.Gly70Arg        | Mis   | - | Tol | Benign  | 1.1  | -   | 1    | 0.033% | -   | -      | -   | -      |
| <i>INS</i>     | c.212G>T        | p.Gly71Val        | Mis   | - | Tol | Benign  | 0.6  | -   | 1    | 0.033% | -   | -      | -   | -      |
| <i>INS</i>     | c.224G>A        | p.Gly75Asp        | Mis   | - | Tol | Pos     | 0.5  | -   | -    | -      | 6   | 0.18%  | 1   | 0.11%  |
| <i>INS</i>     | c.227G>A        | p.Ser76Asn        | Mis   | - | Tol | Benign  | 1.0  | -   | -    | -      | 6   | 0.18%  | -   | -      |
| <i>NEUROD1</i> | c.61A>G         | p.Ser21Gly        | Mis   | - | Tol | Benign  | 2.5  | -   | 1    | 0.032% | -   | -      | -   | -      |
| <i>NEUROD1</i> | c.117G>T        | p.Lys39Asn        | Mis   | - | Tol | Benign  | 0.9  | -   | -    | -      | -   | -      | 1   | 0.065% |
| <i>NEUROD1</i> | c.133A>G        | p.Thr45Ala        | Mis   | - | Tol | Benign  | 0.6  | Yes | 1139 | 36.6%  | 880 | 26.6%  | 602 | 39.9%  |
| <i>NEUROD1</i> | c.257C>T        | p.Pro86Leu        | Mis   | - | Tol | Prob    | 6.1  | -   | -    | -      | 1   | 0.029% | -   | -      |
| <i>NEUROD1</i> | c.269_271delAGA | p.Lys90del        | Del   | - | NA  | NA      | 5.0  | -   | -    | -      | 1   | 0.029% | -   | -      |
| <i>NEUROD1</i> | c.272_274delTGA | p.Met91del        | Del   | - | NA  | NA      | 6.1  | -   | -    | -      | 1   | 0.029% | -   | -      |
| <i>NEUROD1</i> | c.454delG       | p.Ala152LeufsX110 | Frame | - | NA  | NA      | 6.0  | -   | -    | -      | -   | -      | 1   | 0.065% |
| <i>NEUROD1</i> | c.554C>T        | p.Ala185Val       | Mis   | - | Del | Prob    | 6.0  | -   | -    | -      | 1   | 0.029% | -   | -      |
| <i>NEUROD1</i> | c.574C>T        | p.Pro192Ser       | Mis   | - | Tol | Pos     | 4.4  | -   | 1    | 0.032% | -   | -      | -   | -      |
| <i>NEUROD1</i> | c.590C>A        | p.Pro197His       | Mis   | - | Tol | Pos     | 6.0  | Yes | 96   | 3.1%   | 8   | 0.24%  | 25  | 1.6%   |
| <i>NEUROD1</i> | c.610C>T        | p.Pro204Ser       | Mis   | - | Tol | Benign  | 2.9  | Yes | 1    | 0.032% | 8   | 0.24%  | -   | -      |
| <i>NEUROD1</i> | c.917C>T        | p.Ala306Val       | Mis   | - | Tol | Benign  | 3.0  | -   | -    | -      | 3   | 0.088% | -   | -      |
| <i>NEUROD1</i> | c.1031G>A       | p.Arg344Gln       | Mis   | - | Del | Pos     | 6.2  | -   | -    | -      | 1   | 0.029% | -   | -      |
| <i>PDX1</i>    | c.38T>C         | p.Leu13Pro        | Mis   | - | Del | Pos     | 4.5  | -   | 1    | 0.036% | -   | -      | -   | -      |
| <i>PDX1</i>    | c.52T>C         | p.Cys18Arg        | Mis   | - | Del | Prob    | 4.5  | -   | 1    | 0.037% | 1   | 0.062% | 2   | 0.15%  |
| <i>PDX1</i>    | c.54C>A         | p.Cys18X          | Stop  | - | NA  | NA      | 1.5  | -   | -    | -      | 2   | 0.13%  | 1   | 0.074% |
| <i>PDX1</i>    | c.107T>G        | p.Leu36Arg        | Mis   | - | Tol | Benign  | 4.6  | -   | 2    | 0.18%  | -   | -      | -   | -      |
| <i>PDX1</i>    | c.119G>T        | p.Arg40Leu        | Mis   | - | Del | Pos     | 3.9  | -   | -    | -      | 3   | 0.38%  | -   | -      |
| <i>PDX1</i>    | c.211C>A        | p.Pro71Thr        | Mis   | - | Del | Pos     | 2.6  | -   | -    | -      | 3   | 0.21%  | 2   | 1.9%   |
| <i>PDX1</i>    | c.226G>A        | p.Asp76Asn        | Mis   | - | Del | Benign  | 3.7  | -   | 10   | 0.67%  | 1   | 0.063% | 4   | 2.3%   |
| <i>PDX1</i>    | c.244C>T        | p.Leu82Phe        | Mis   | - | Del | Benign  | 2.1  | -   | 2    | 0.13%  | -   | -      | -   | -      |
| <i>PDX1</i>    | c.304G>A        | p.Glu102Lys       | Mis   | - | Tol | Benign  | 3.7  | -   | 1    | 0.2%   | 1   | 0.034% | -   | -      |
| <i>PDX1</i>    | c.338A>G        | p.Asn113Ser       | Mis   | - | Tol | Benign  | 0.7  | -   | -    | -      | 1   | 0.03%  | -   | -      |
| <i>PDX1</i>    | c.418G>A        | p.Ala140Thr       | Mis   | - | Tol | Benign  | -0.3 | Yes | 2    | 0.08%  | -   | -      | 1   | 0.068% |
| <i>PDX1</i>    | c.679T>C        | p.Cys227Arg       | Mis   | - | Del | Pos     | 2.4  | -   | 1    | 0.037% | -   | -      | -   | -      |
| <i>PDX1</i>    | c.716C>A        | p.Pro239Gln       | Mis   | - | Tol | Benign  | 0.0  | Yes | 6    | 0.77%  | 79  | 3.9%   | 7   | 0.73%  |
| <i>PDX1</i>    | c.719C>A        | p.Pro240Gln       | Mis   | - | Del | Benign  | 0.9  | -   | -    | -      | 4   | 0.24%  | -   | -      |
| <i>PDX1</i>    | c.725C>T        | p.Pro242Leu       | Mis   | - | Tol | Benign  | 0.2  | -   | 4    | 1.3%   | 2   | 0.17%  | 3   | 0.8%   |

Supplementary Table 2: **List of variants identified in unselected or extreme cohorts.** Shown is a full catalog of all non-synonymous variants identified in the study. 'Type': impact of variant on protein, where 'Mis' denotes missense variant, 'Splice' denotes variant predicted to affect splicing, and 'Frame' denotes frameshift variant; 'SIFT': SIFT prediction, where 'Tol' denotes tolerated and 'Del' denotes deleterious; 'PPH': PolyPhen2 predictions, where 'Pos' denotes possibly damaging and 'Prob' denotes probably damaging; 'Cons': conservation score from 46-way vertebrate alignment, with positive numbers denoting increased conservation; '1000G': whether the variant was identified in the individuals sequenced for the 1000G project; 'Freq': the frequency in each cohort. Variants are sorted first by presence in HGMD and second by transcript position. Variants removed from analysis due to differential call rates between cases and controls are shown in italics.

| Gene  | Nucleotide change | Amino acid change | FHS cohort |       |           |        | JHS cohort |       |           |        | T2D cohort |       |           |       |
|-------|-------------------|-------------------|------------|-------|-----------|--------|------------|-------|-----------|--------|------------|-------|-----------|-------|
|       |                   |                   | Count      |       | Frequency |        | Count      |       | Frequency |        | Count      |       | Frequency |       |
|       |                   |                   | DM         | No DM | DM        | No DM  | DM         | No DM | DM        | No DM  | DM         | No DM | DM        | No DM |
| GCK   | c.45+1G>T         | NA                | -          | -     | -         | -      | -          | -     | -         | -      | 1          | 0     | 0.14%     | 0.    |
| GCK   | c.394G>A          | p.Asp132Asn       | -          | -     | -         | -      | 0          | 1     | 0.        | 0.037% | -          | -     | -         | -     |
| GCK   | c.1386G>T         | p.Met462Ile       | 0          | 1     | 0.        | 0.038% | -          | -     | -         | -      | -          | -     | -         | -     |
| GCK   | c.31G>A           | p.Ala11Thr        | -          | -     | -         | -      | 11         | 63    | 1.6%      | 2.4%   | -          | -     | -         | -     |
| GCK   | c.39G>T           | p.Lys13Asn        | 0          | 1     | 0.        | 0.037% | -          | -     | -         | -      | -          | -     | -         | -     |
| GCK   | c.106C>T          | p.Arg36Trp        | -          | -     | -         | -      | -          | -     | -         | -      | 1          | 0     | 0.14%     | 0.    |
| GCK   | c.334G>A          | p.Glu112Lys       | 0          | 1     | 0.        | 0.037% | -          | -     | -         | -      | -          | -     | -         | -     |
| GCK   | c.385T>C          | p.Cys129Arg       | 1          | 0     | 0.22%     | 0.     | -          | -     | -         | -      | -          | -     | -         | -     |
| GCK   | c.493C>A          | p.Leu165Ile       | -          | -     | -         | -      | -          | -     | -         | -      | 1          | 0     | 0.14%     | 0.    |
| GCK   | c.575G>A          | p.Arg192Lys       | -          | -     | -         | -      | 1          | 1     | 0.14%     | 0.037% | -          | -     | -         | -     |
| GCK   | c.649G>A          | p.Asp217Asn       | 0          | 1     | 0.        | 0.037% | -          | -     | -         | -      | 0          | 1     | 0.        | 0.12% |
| GCK   | c.835G>C          | p.Glu279Gln       | -          | -     | -         | -      | 1          | 1     | 0.14%     | 0.037% | -          | -     | -         | -     |
| GCK   | c.988T>G          | p.Phe330Val       | -          | -     | -         | -      | 0          | 1     | 0.        | 0.037% | -          | -     | -         | -     |
| GCK   | c.1025C>G         | p.Thr342Arg       | -          | -     | -         | -      | 0          | 2     | 0.        | 0.074% | -          | -     | -         | -     |
| HNF1A | c.92G>A           | p.Gly31Asp        | 0          | 5     | 0.        | 0.19%  | 1          | 0     | 0.14%     | 0.     | 0          | 1     | 0.        | 0.12% |
| HNF1A | c.142G>A          | p.Glu48Lys        | 0          | 1     | 0.        | 0.038% | -          | -     | -         | -      | -          | -     | -         | -     |
| HNF1A | c.185A>G          | p.Asn62Ser        | 0          | 1     | 0.        | 0.038% | 0          | 1     | 0.        | 0.037% | -          | -     | -         | -     |
| HNF1A | c.392G>A          | p.Arg131Gln       | -          | -     | -         | -      | -          | -     | -         | -      | 1          | 0     | 0.14%     | 0.    |
| HNF1A | c.586A>G          | p.Thr196Ala       | -          | -     | -         | -      | -          | -     | -         | -      | 0          | 1     | 0.        | 0.12% |
| HNF1A | c.827C>G          | p.Ala276Gly       | 0          | 1     | 0.        | 0.037% | -          | -     | -         | -      | -          | -     | -         | -     |
| HNF1A | c.965A>G          | p.Tyr322Cys       | -          | -     | -         | -      | 3          | 3     | 0.43%     | 0.11%  | -          | -     | -         | -     |
| HNF1A | c.1165T>G         | p.Leu389Val       | -          | -     | -         | -      | 4          | 14    | 0.57%     | 0.52%  | -          | -     | -         | -     |
| HNF1A | c.1513C>A         | p.His505Asn       | 0          | 1     | 0.        | 0.038% | -          | -     | -         | -      | -          | -     | -         | -     |
| HNF1A | c.1522G>A         | p.Glu508Lys       | 1          | 0     | 0.23%     | 0.     | -          | -     | -         | -      | -          | -     | -         | -     |
| HNF1A | c.1544C>A         | p.Thr515Lys       | -          | -     | -         | -      | 1          | 0     | 0.14%     | 0.     | -          | -     | -         | -     |
| HNF1A | c.1748G>A         | p.Arg583Gln       | 0          | 4     | 0.        | 0.16%  | -          | -     | -         | -      | -          | -     | -         | -     |
| HNF1A | c.79A>C           | p.Ile27Leu        | 165        | 936   | 37.7%     | 35.7%  | 95         | 318   | 14.7%     | 12.7%  | 259        | 277   | 37.7%     | 34.7% |
| HNF1A | c.290C>T          | p.Ala97Val        | -          | -     | -         | -      | 0          | 1     | 0.        | 0.037% | -          | -     | -         | -     |
| HNF1A | c.293C>T          | p.Ala98Val        | 9          | 53    | 2.7%      | 2.7%   | 4          | 16    | 0.57%     | 0.59%  | 32         | 21    | 4.6%      | 2.6%  |
| HNF1A | c.298C>A          | p.Gln100Lys       | -          | -     | -         | -      | 1          | 0     | 0.14%     | 0.     | -          | -     | -         | -     |
| HNF1A | c.307G>A          | p.Val103Met       | 1          | 0     | 0.22%     | 0.     | -          | -     | -         | -      | -          | -     | -         | -     |
| HNF1A | c.341G>A          | p.Arg114His       | -          | -     | -         | -      | 1          | 0     | 0.14%     | 0.     | 0          | 1     | 0.        | 0.12% |
| HNF1A | c.533C>T          | p.Thr178Ile       | 0          | 1     | 0.        | 0.037% | -          | -     | -         | -      | -          | -     | -         | -     |
| HNF1A | c.818_820delAAG   | p.Glu274del       | 1          | 0     | 0.22%     | 0.     | -          | -     | -         | -      | -          | -     | -         | -     |
| HNF1A | c.824A>C          | p.Glu275Ala       | 0          | 1     | 0.        | 0.037% | -          | -     | -         | -      | -          | -     | -         | -     |
| HNF1A | c.854C>T          | p.Thr285Met       | 0          | 1     | 0.        | 0.037% | -          | -     | -         | -      | -          | -     | -         | -     |
| HNF1A | c.1360A>G         | p.Ser454Gly       | -          | -     | -         | -      | -          | -     | -         | -      | 1          | 0     | 0.15%     | 0.    |
| HNF1A | c.1405C>T         | p.His469Tyr       | 0          | 2     | 0.        | 0.076% | 0          | 1     | 0.        | 0.037% | -          | -     | -         | -     |
| HNF1A | c.1460G>A         | p.Ser487Asn       | 148        | 890   | 33.3%     | 34.7%  | 90         | 336   | 13.3%     | 12.7%  | 227        | 249   | 34.7%     | 31.7% |
| HNF1A | c.1469T>C         | p.Met490Thr       | -          | -     | -         | -      | -          | -     | -         | -      | 0          | 1     | 0.        | 0.12% |
| HNF1A | c.1532A>G         | p.Gln511Arg       | 0          | 1     | 0.        | 0.038% | -          | -     | -         | -      | -          | -     | -         | -     |
| HNF1A | c.1541A>G         | p.His514Arg       | 1          | 0     | 0.23%     | 0.     | -          | -     | -         | -      | -          | -     | -         | -     |
| HNF1A | c.1696C>A         | p.His566Asn       | -          | -     | -         | -      | 0          | 1     | 0.        | 0.037% | -          | -     | -         | -     |
| HNF1A | c.1720A>G         | p.Ser574Gly       | -          | -     | -         | -      | 35         | 135   | 95.0%     | 95.0%  | -          | -     | -         | -     |
| HNF1A | c.1729C>G         | p.His577Asp       | 0          | 1     | 0.        | 0.041% | -          | -     | -         | -      | -          | -     | -         | -     |
| HNF1B | c.182T>G          | p.Val61Gly        | 1          | 2     | 0.23%     | 0.076% | -          | -     | -         | -      | 1          | 0     | 0.15%     | 0.    |
| HNF1B | c.226G>T          | p.Gly76Cys        | 0          | 3     | 0.        | 0.11%  | 1          | 2     | 0.14%     | 0.074% | 0          | 2     | 0.        | 0.25% |
| HNF1B | c.1108G>A         | p.Gly370Ser       | -          | -     | -         | -      | 0          | 1     | 0.        | 0.037% | -          | -     | -         | -     |
| HNF1B | c.1474G>A         | p.Gly492Ser       | 0          | 2     | 0.        | 0.075% | -          | -     | -         | -      | 2          | 5     | 0.29%     | 0.61% |
| HNF1B | c.35T>G           | p.Leu12Arg        | 0          | 1     | 0.        | 0.037% | -          | -     | -         | -      | -          | -     | -         | -     |
| HNF1B | c.127C>G          | p.Leu43Val        | -          | -     | -         | -      | 0          | 2     | 0.        | 0.074% | -          | -     | -         | -     |
| HNF1B | c.145T>A          | p.Ser49Thr        | 0          | 1     | 0.        | 0.037% | -          | -     | -         | -      | -          | -     | -         | -     |
| HNF1B | c.244G>A          | p.Asp82Asn        | 0          | 2     | 0.        | 0.076% | 1          | 1     | 0.14%     | 0.037% | -          | -     | -         | -     |
| HNF1B | c.335G>A          | p.Arg112Gln       | 0          | 1     | 0.        | 0.04%  | -          | -     | -         | -      | 0          | 1     | 0.        | 0.13% |
| HNF1B | c.684C>G          | p.Asn228Lys       | -          | -     | -         | -      | 1          | 2     | 0.14%     | 0.074% | -          | -     | -         | -     |
| HNF1B | c.905A>G          | p.Asn302Ser       | -          | -     | -         | -      | -          | -     | -         | -      | 1          | 0     | 0.14%     | 0.    |
| HNF1B | c.944T>C          | p.Met315Thr       | 0          | 1     | 0.        | 0.037% | -          | -     | -         | -      | -          | -     | -         | -     |
| HNF1B | c.953A>G          | p.Tyr318Cys       | -          | -     | -         | -      | 0          | 1     | 0.        | 0.037% | -          | -     | -         | -     |
| HNF1B | c.1561dupC        | p.Gln521ArgfsX30  | -          | -     | -         | -      | -          | -     | -         | -      | 18         | 13    | 2.6%      | 1.7%  |
| HNF1B | c.1594A>G         | p.Met532Val       | 0          | 1     | 0.        | 0.037% | -          | -     | -         | -      | -          | -     | -         | -     |
| HNF1B | c.1598T>C         | p.Val533Ala       | -          | -     | -         | -      | 0          | 1     | 0.        | 0.037% | -          | -     | -         | -     |
| HNF1B | c.1621A>C         | p.Ser541Arg       | -          | -     | -         | -      | -          | -     | -         | -      | 1          | 0     | 0.14%     | 0.    |
| HNF1B | c.1657C>A         | p.Pro553Thr       | -          | -     | -         | -      | 0          | 1     | 0.        | 0.037% | -          | -     | -         | -     |
| HNF4A | c.406C>T          | p.Arg136Trp       | 0          | 1     | 0.        | 0.037% | -          | -     | -         | -      | -          | -     | -         | -     |
| HNF4A | c.488G>A          | p.Arg163Gln       | -          | -     | -         | -      | -          | -     | -         | -      | 1          | 0     | 0.14%     | 0.    |
| HNF4A | c.790G>A          | p.Val264Met       | 1          | 0     | 0.22%     | 0.     | -          | -     | -         | -      | -          | -     | -         | -     |
| HNF4A | c.929G>A          | p.Arg310Gln       | 0          | 1     | 0.        | 0.037% | -          | -     | -         | -      | -          | -     | -         | -     |
| HNF4A | c.1193T>C         | p.Met398Thr       | 0          | 1     | 0.        | 0.037% | -          | -     | -         | -      | -          | -     | -         | -     |
| HNF4A | c.1333C>T         | p.Pro445Ser       | -          | -     | -         | -      | -          | -     | -         | -      | 1          | 0     | 0.14%     | 0.    |
| HNF4A | c.134G>A          | p.Gly45Asp        | -          | -     | -         | -      | 0          | 1     | 0.        | 0.037% | -          | -     | -         | -     |
| HNF4A | c.152C>A          | p.Pro51His        | -          | -     | -         | -      | 0          | 1     | 0.        | 0.037% | -          | -     | -         | -     |

|                |                 |                   |     |     |       |        |     |     |       |        |     |     |       |       |
|----------------|-----------------|-------------------|-----|-----|-------|--------|-----|-----|-------|--------|-----|-----|-------|-------|
| <i>HNF4A</i>   | c.299G>A        | p.Arg100Gln       | -   | -   | -     | -      | 0   | 1   | 0.    | 0.037% | -   | -   | -     | -     |
| <i>HNF4A</i>   | c.365G>T        | p.Arg122Leu       | -   | -   | -     | -      | -   | -   | -     | -      | 1   | 0   | 0.14% | 0.    |
| <i>HNF4A</i>   | c.416C>T        | p.Thr139Ile       | 21  | 71  | 4.7%  | 2.7%   | 6   | 18  | 0.86% | 0.67%  | 35  | 37  | 4.9%  | 4.5%  |
| <i>HNF4A</i>   | c.427A>G        | p.Ser143Gly       | 0   | 1   | 0.    | 0.037% | -   | -   | -     | -      | -   | -   | -     | -     |
| <i>HNF4A</i>   | c.505G>A        | p.Val169Ile       | -   | -   | -     | -      | 0   | 2   | 0.    | 0.074% | -   | -   | -     | -     |
| <i>HNF4A</i>   | c.530G>A        | p.Arg177Gln       | -   | -   | -     | -      | 0   | 1   | 0.    | 0.037% | -   | -   | -     | -     |
| <i>HNF4A</i>   | c.655C>A        | p.Leu219Met       | -   | -   | -     | -      | -   | -   | -     | -      | 1   | 0   | 0.14% | 0.    |
| <i>HNF4A</i>   | c.748A>G        | p.Ile250Val       | -   | -   | -     | -      | 1   | 0   | 0.14% | 0.     | -   | -   | -     | -     |
| <i>HNF4A</i>   | c.928C>T        | p.Arg310Trp       | 0   | 1   | 0.    | 0.037% | -   | -   | -     | -      | -   | -   | -     | -     |
| <i>HNF4A</i>   | c.1103A>G       | p.Asn368Ser       | 1   | 0   | 0.22% | 0.     | -   | -   | -     | -      | -   | -   | -     | -     |
| <i>HNF4A</i>   | c.1161C>A       | p.His387Gln       | -   | -   | -     | -      | 0   | 1   | 0.    | 0.037% | -   | -   | -     | -     |
| <i>HNF4A</i>   | c.1210G>A       | p.Val404Ile       | -   | -   | -     | -      | -   | -   | -     | -      | 1   | 0   | 0.14% | 0.    |
| <i>HNF4A</i>   | c.1250T>C       | p.Met417Thr       | 0   | 1   | 0.    | 0.037% | -   | -   | -     | -      | -   | -   | -     | -     |
| <i>HNF4A</i>   | c.1360G>A       | p.Ala454Thr       | -   | -   | -     | -      | -   | -   | -     | -      | 0   | 1   | 0.    | 0.12% |
| <i>HNF4A</i>   | c.1369G>C       | p.Val457Leu       | -   | -   | -     | -      | 0   | 1   | 0.    | 0.037% | -   | -   | -     | -     |
| <i>HNF4A</i>   | c.1387A>G       | p.Ile463Val       | 0   | 1   | 0.    | 0.037% | -   | -   | -     | -      | 0   | 1   | 0.    | 0.12% |
| <i>INS</i>     | c.17G>A         | p.Arg6His         | 0   | 1   | 0.    | 0.038% | 0   | 2   | 0.    | 0.074% | 1   | 1   | 0.3%  | 0.25% |
| <i>INS</i>     | c.67G>T         | p.Ala23Ser        | 0   | 1   | 0.    | 0.038% | 0   | 1   | 0.    | 0.037% | -   | -   | -     | -     |
| <i>INS</i>     | c.208G>A        | p.Gly70Arg        | 0   | 1   | 0.    | 0.039% | -   | -   | -     | -      | -   | -   | -     | -     |
| <i>INS</i>     | c.212G>T        | p.Gly71Val        | 0   | 1   | 0.    | 0.039% | -   | -   | -     | -      | -   | -   | -     | -     |
| <i>INS</i>     | c.224G>A        | p.Gly75Asp        | -   | -   | -     | -      | 0   | 6   | 0.    | 0.22%  | 1   | 0   | 0.23% | 0.    |
| <i>INS</i>     | c.227G>A        | p.Ser76Asn        | -   | -   | -     | -      | 0   | 6   | 0.    | 0.22%  | -   | -   | -     | -     |
| <i>NEUROD1</i> | c.61A>G         | p.Ser21Gly        | 0   | 1   | 0.    | 0.037% | -   | -   | -     | -      | -   | -   | -     | -     |
| <i>NEUROD1</i> | c.117G>T        | p.Lys39Asn        | -   | -   | -     | -      | -   | -   | -     | -      | 1   | 0   | 0.14% | 0.    |
| <i>NEUROD1</i> | c.133A>G        | p.Thr45Ala        | 167 | 972 | 63.3% | 64.4%  | 169 | 711 | 76.6% | 74.4%  | 287 | 315 | 60.0% | 61.1% |
| <i>NEUROD1</i> | c.257C>T        | p.Pro86Leu        | -   | -   | -     | -      | 0   | 1   | 0.    | 0.037% | -   | -   | -     | -     |
| <i>NEUROD1</i> | c.269_271delAGA | p.Lys90del        | -   | -   | -     | -      | 0   | 1   | 0.    | 0.037% | -   | -   | -     | -     |
| <i>NEUROD1</i> | c.272_274delTGA | p.Met91del        | -   | -   | -     | -      | 0   | 1   | 0.    | 0.037% | -   | -   | -     | -     |
| <i>NEUROD1</i> | c.454delG       | p.Ala152LeufsX110 | -   | -   | -     | -      | -   | -   | -     | -      | 1   | 0   | 0.14% | 0.    |
| <i>NEUROD1</i> | c.554C>T        | p.Ala185Val       | -   | -   | -     | -      | 0   | 1   | 0.    | 0.037% | -   | -   | -     | -     |
| <i>NEUROD1</i> | c.574C>T        | p.Pro192Ser       | 1   | 0   | 0.22% | 0.     | -   | -   | -     | -      | -   | -   | -     | -     |
| <i>NEUROD1</i> | c.590C>A        | p.Pro197His       | 14  | 82  | 3.1%  | 3.1%   | 0   | 8   | 0.    | 0.3%   | 12  | 13  | 1.7%  | 1.6%  |
| <i>NEUROD1</i> | c.610C>T        | p.Pro204Ser       | 0   | 1   | 0.    | 0.037% | 1   | 7   | 0.14% | 0.26%  | -   | -   | -     | -     |
| <i>NEUROD1</i> | c.917C>T        | p.Ala306Val       | -   | -   | -     | -      | 1   | 2   | 0.14% | 0.074% | -   | -   | -     | -     |
| <i>NEUROD1</i> | c.1031G>A       | p.Arg344Gln       | -   | -   | -     | -      | 0   | 1   | 0.    | 0.037% | -   | -   | -     | -     |
| <i>PDX1</i>    | c.38T>C         | p.Leu13Pro        | 0   | 1   | 0.    | 0.042% | -   | -   | -     | -      | -   | -   | -     | -     |
| <i>PDX1</i>    | c.52T>C         | p.Cys18Arg        | 1   | 0   | 0.25% | 0.     | 1   | 0   | 0.31% | 0.     | 2   | 0   | 0.33% | 0.    |
| <i>PDX1</i>    | c.54C>A         | p.Cys18X          | -   | -   | -     | -      | 0   | 2   | 0.    | 0.16%  | 1   | 0   | 0.17% | 0.    |
| <i>PDX1</i>    | c.107T>G        | p.Leu36Arg        | 0   | 2   | 0.    | 0.22%  | -   | -   | -     | -      | -   | -   | -     | -     |
| <i>PDX1</i>    | c.119G>T        | p.Arg40Leu        | -   | -   | -     | -      | 2   | 1   | 1.3%  | 0.16%  | -   | -   | -     | -     |
| <i>PDX1</i>    | c.211C>A        | p.Pro71Thr        | -   | -   | -     | -      | 0   | 3   | 0.    | 0.26%  | 0   | 2   | 0.    | 3.1%  |
| <i>PDX1</i>    | c.226G>A        | p.Asp76Asn        | 1   | 9   | 0.45% | 0.71%  | 0   | 1   | 0.    | 0.078% | 0   | 4   | 0.    | 3.2%  |
| <i>PDX1</i>    | c.244C>T        | p.Leu82Phe        | 1   | 1   | 0.4%  | 0.075% | -   | -   | -     | -      | -   | -   | -     | -     |
| <i>PDX1</i>    | c.304G>A        | p.Glu102Lys       | 0   | 1   | 0.    | 0.24%  | 0   | 1   | 0.    | 0.042% | -   | -   | -     | -     |
| <i>PDX1</i>    | c.338A>G        | p.Asn113Ser       | -   | -   | -     | -      | 0   | 1   | 0.    | 0.037% | -   | -   | -     | -     |
| <i>PDX1</i>    | c.418G>A        | p.Ala140Thr       | 1   | 1   | 0.27% | 0.047% | -   | -   | -     | -      | 1   | 0   | 0.15% | 0.    |
| <i>PDX1</i>    | c.679T>C        | p.Cys227Arg       | 1   | 0   | 0.26% | 0.     | -   | -   | -     | -      | -   | -   | -     | -     |
| <i>PDX1</i>    | c.716C>A        | p.Pro239Gln       | 1   | 5   | 0.78% | 0.77%  | 15  | 64  | 3.5%  | 4.0%   | 3   | 4   | 0.72% | 0.74% |
| <i>PDX1</i>    | c.719C>A        | p.Pro240Gln       | -   | -   | -     | -      | 1   | 3   | 0.29% | 0.22%  | -   | -   | -     | -     |
| <i>PDX1</i>    | c.725C>T        | p.Pro242Leu       | 0   | 4   | 0.    | 1.5%   | 1   | 1   | 0.49% | 0.1%   | 2   | 1   | 1.2%  | 0.48% |

Supplementary Table 3: **Variant counts in individuals with and without diabetes.** For each variant identified, shown are the counts and frequencies in individuals with (DM) and without (No DM) diabetes.

| Gene    | Nucleotide change           | Amino acid change           | Type        | HGMD | SIFT | PPH     | Cons | 1000G | Counts MODY | Frequency |        |        |
|---------|-----------------------------|-----------------------------|-------------|------|------|---------|------|-------|-------------|-----------|--------|--------|
|         |                             |                             |             |      |      |         |      |       |             | FHS       | JHS    | T2D    |
| GCK     | c.1016A>G                   | p.Glu339Gly                 | Mis         | Yes  | Del  | Prob    | 4.7  | -     | 11          | -         | -      | -      |
| GCK     | c.1129C>T                   | p.Arg377Cys                 | Mis         | Yes  | Del  | Prob    | 5.9  | -     | 2           | -         | -      | -      |
| GCK     | c.1175G>C                   | p.Arg392Pro                 | Mis         | -    | Del  | Pos     | 3.1  | -     | 1           | -         | -      | -      |
| GCK     | c.128G>C                    | p.Arg43Pro                  | Mis         | Yes  | Del  | Prob    | 4.1  | -     | 1           | -         | -      | -      |
| GCK     | c.130G>A                    | p.Gly44Ser                  | Mis         | Yes  | Del  | Prob    | 5.9  | -     | 1           | -         | -      | -      |
| GCK     | c.1322C>A                   | p.Ser441X                   | Stop        | Yes  | NA   | NA      | 4.5  | -     | 1           | -         | -      | -      |
| GCK     | c.1340G>A                   | p.Arg447Gln                 | Mis         | Yes  | Del  | Prob    | 3.4  | -     | 1           | -         | -      | -      |
| GCK     | c.1361C>A                   | p.Ala454Glu                 | Mis         | Yes  | Del  | Prob    | 6.2  | -     | 1           | -         | -      | -      |
| GCK     | c.214G>A                    | p.Gly72Arg                  | Mis         | Yes  | Del  | Prob    | 5.7  | -     | 1           | -         | -      | -      |
| GCK     | c.227C>A                    | p.Ser76Tyr                  | Mis         | Yes  | Del  | Prob    | 5.7  | -     | 3           | -         | -      | -      |
| GCK     | c.363+2T>A                  | NA                          | Splice      | Yes  | NA   | NA      | 4.6  | -     | 1           | -         | -      | -      |
| GCK     | c.469G>A                    | p.Glu157Lys                 | Mis         | Yes  | Tol  | Prob    | 4.3  | -     | 1           | -         | -      | -      |
| GCK     | c.485G>A                    | p.Gly162Asp                 | Mis         | Yes  | Del  | Prob    | 6.1  | -     | 1           | -         | -      | -      |
| GCK     | c.544G>A                    | p.Val182Met                 | Mis         | Yes  | Del  | Prob    | 6.2  | -     | 1           | -         | -      | -      |
| GCK     | c.556C>G                    | p.Arg186Gly                 | Mis         | -    | Del  | Prob    | 0.1  | -     | 1           | -         | -      | -      |
| GCK     | c.571C>T                    | p.Arg191Trp                 | Mis         | -    | Del  | Prob    | 0.5  | -     | 2           | -         | -      | -      |
| GCK     | c.579+1G>C                  | NA                          | Splice      | Yes  | NA   | NA      | 6.2  | -     | 6           | -         | -      | -      |
| GCK     | c.622G>A                    | p.Ala208Thr                 | Mis         | Yes  | Del  | Prob    | 6.2  | -     | 1           | -         | -      | -      |
| GCK     | c.645C>G                    | p.Tyr215X                   | Stop        | Yes  | NA   | NA      | -1.2 | Yes   | 1           | -         | -      | -      |
| GCK     | c.658T>C                    | p.Cys220Arg                 | Mis         | -    | Del  | Benign  | 5.2  | -     | 1           | -         | -      | -      |
| GCK     | c.766G>A                    | p.Glu256Lys                 | Mis         | Yes  | Del  | Prob    | 5.9  | -     | 1           | -         | -      | -      |
| GCK     | c.823C>T                    | p.Arg275Cys                 | Mis         | Yes  | Del  | Pos     | 3.0  | -     | 1           | -         | -      | -      |
| GCK     | c.883G>C                    | p.Gly295Arg                 | Mis         | -    | Del  | Pos     | 5.6  | -     | 1           | -         | -      | -      |
| HNF1A   | c.1243G>A                   | p.Gly415Arg                 | Mis         | -    | Del  | Prob    | 5.4  | -     | 1           | -         | -      | -      |
| HNF1A   | c.1340C>T                   | p.Pro447Leu                 | Mis         | Yes  | Del  | Prob    | 5.4  | -     | 1           | -         | -      | -      |
| HNF1A   | c.1460G>A                   | p.Ser487Asn                 | Mis         | -    | Tol  | Benign  | 0.9  | Yes   | 40          | 34.%      | 13.%   | 32.%   |
| HNF1A   | c.1576G>A                   | p.Asp526Asn                 | Mis         | Yes  | Del  | Prob    | 5.7  | -     | 1           | -         | -      | -      |
| HNF1A   | c.1592G>C                   | p.Ser531Thr                 | Mis         | Yes  | Tol  | Benign  | 5.2  | -     | 2           | -         | -      | -      |
| HNF1A   | c.1745A>G                   | p.His582Arg                 | Mis         | -    | Del  | Benign  | 2.3  | -     | 1           | -         | -      | -      |
| HNF1A   | c.17G>A                     | p.Ser6Asn                   | Mis         | -    | Del  | Unknown | 1.9  | -     | 2           | -         | -      | -      |
| HNF1A   | c.293C>T                    | p.Ala98Val                  | Mis         | -    | Del  | Benign  | 5.0  | Yes   | 4           | 2.%       | 0.59%  | 3.5%   |
| HNF1A   | c.335C>T                    | p.Pro112Leu                 | Mis         | Yes  | Del  | Prob    | 5.7  | -     | 5           | -         | -      | -      |
| HNF1A   | c.346G>A                    | p.Ala116Thr                 | Mis         | Yes  | Del  | Prob    | 3.8  | -     | 1           | -         | -      | -      |
| HNF1A   | c.391C>T                    | p.Arg131Trp                 | Mis         | Yes  | Del  | Prob    | 0.4  | -     | 2           | -         | -      | -      |
| HNF1A   | c.475C>T                    | p.Arg159Trp                 | Mis         | Yes  | Del  | Prob    | 0.4  | -     | 1           | -         | -      | -      |
| HNF1A   | c.523C>G                    | p.Gln175Glu                 | Mis         | Yes  | Tol  | Benign  | 1.8  | -     | 1           | -         | -      | -      |
| HNF1A   | c.539C>T                    | p.Ala180Val                 | Mis         | -    | Tol  | Benign  | 5.2  | -     | 3           | -         | -      | -      |
| HNF1A   | c.598C>T                    | p.Arg200Trp                 | Mis         | Yes  | Del  | Prob    | 0.1  | -     | 1           | -         | -      | -      |
| HNF1A   | c.607C>T                    | p.Arg203Cys                 | Mis         | Yes  | Del  | Prob    | 2.5  | -     | 1           | -         | -      | -      |
| HNF1A   | c.608G>A                    | p.Arg203His                 | Mis         | Yes  | Del  | Prob    | 5.0  | -     | 1           | -         | -      | -      |
| HNF1A   | c.685C>T                    | p.Arg229X                   | Stop        | Yes  | NA   | NA      | 0.2  | -     | 1           | -         | -      | -      |
| HNF1A   | c.686G>A                    | p.Arg229Gln                 | Mis         | Yes  | Del  | Pos     | 5.4  | -     | 3           | -         | -      | -      |
| HNF1A   | c.714-1G>A                  | NA                          | Splice      | Yes  | NA   | NA      | 5.5  | -     | 1           | -         | -      | -      |
| HNF1A   | c.766T>A                    | p.Ser256Thr                 | Mis         | Yes  | Del  | Prob    | 4.6  | -     | 1           | -         | -      | -      |
| HNF1A   | c.788G>A                    | p.Arg263His                 | Mis         | Yes  | Del  | Prob    | 5.5  | -     | 2           | -         | -      | -      |
| HNF1A   | c.797A>G                    | p.Asn266Ser                 | Mis         | -    | Del  | Pos     | 4.6  | -     | 2           | -         | -      | -      |
| HNF1A   | c.79A>C                     | p.Ile27Leu                  | Mis         | -    | Del  | Benign  | 1.6  | Yes   | 49          | 35.%      | 12.%   | 35.%   |
| HNF1A   | c.812G>A                    | p.Arg271Gln                 | Mis         | Yes  | Del  | Prob    | 5.5  | -     | 1           | -         | -      | -      |
| HNF1A   | c.827C>A                    | p.Ala276Asp                 | Mis         | Yes  | Del  | Prob    | 5.5  | -     | 1           | -         | -      | -      |
| HNF1A   | c.835_841delCACAAAGCinsTACG | p.His279_Leu281delinsTyrVal | Mis         | -    | NA   | NA      | NA   | -     | 1           | -         | -      | -      |
| HNF1A   | c.872dupC                   | p.Gly292ArgfsX25            | Frame       | -    | NA   | NA      | NA   | -     | 21          | -         | -      | -      |
| HNF1A   | c.92G>A                     | p.Gly31Asp                  | Mis         | Yes  | Tol  | Pos     | 0.8  | Yes   | 2           | 0.16%     | 0.029% | 0.066% |
| HNF1B   | c.443C>T                    | p.Ser148Leu                 | Mis         | Yes  | Del  | Prob    | 6.1  | -     | 1           | -         | -      | -      |
| HNF1B   | c.860G>T                    | p.Gly287Val                 | Mis         | -    | Del  | Prob    | 5.9  | -     | 1           | -         | -      | -      |
| HNF4A   | c.216C>A                    | p.Tyr72X                    | Stop        | -    | NA   | NA      | 0.1  | -     | 1           | -         | -      | -      |
| HNF4A   | c.266G>A                    | p.Arg89Gln                  | Mis         | Yes  | Del  | Prob    | 5.9  | -     | 1           | -         | -      | -      |
| HNF4A   | c.400C>T                    | p.Arg134Trp                 | Mis         | Yes  | Del  | Prob    | 3.0  | -     | 1           | -         | -      | -      |
| HNF4A   | c.416C>T                    | p.Thr139Ile                 | Mis         | -    | Tol  | Benign  | 5.9  | Yes   | 5           | -         | -      | -      |
| HNF4A   | c.473C>T                    | p.Ala158Val                 | Mis         | -    | Tol  | Pos     | 5.9  | -     | 1           | -         | -      | -      |
| HNF4A   | c.505G>A                    | p.Val169Ile                 | Mis         | -    | Tol  | Benign  | -0.1 | Yes   | 1           | -         | -      | -      |
| HNF4A   | c.523G>A                    | p.Asp175Asn                 | Mis         | -    | Del  | Benign  | 6.2  | -     | 1           | -         | -      | -      |
| HNF4A   | c.646C>T                    | p.Gln216X                   | Stop,Splice | -    | NA   | NA      | 6.2  | -     | 1           | -         | -      | -      |
| HNF4A   | c.790G>A                    | p.Val264Met                 | Mis         | Yes  | Del  | Prob    | 6.0  | -     | 1           | -         | -      | -      |
| HNF4A   | c.877dupA                   | p.Ile293AsnfsX4             | Frame       | -    | NA   | NA      | NA   | -     | 1           | -         | -      | -      |
| HNF4A   | c.1033C>G                   | p.Gln345Glu                 | Mis         | -    | Del  | Pos     | 6.0  | -     | 1           | -         | -      | -      |
| INS     | c.130G>A                    | p.Gly44Arg                  | Mis         | -    | Del  | Pos     | 3.3  | -     | 1           | -         | -      | -      |
| INS     | c.137G>A                    | p.Arg46Gln                  | Mis         | Yes  | Del  | Pos     | 2.5  | -     | 1           | -         | -      | -      |
| INS     | c.140G>A                    | p.Gly47Asp                  | Mis         | -    | Del  | Prob    | 3.5  | -     | 1           | -         | -      | -      |
| NEUROD1 | c.133A>G                    | p.Thr45Ala                  | Mis         | -    | Tol  | Benign  | 0.6  | Yes   | 27          | 36.%      | 26.%   | 39.%   |
| NEUROD1 | c.723C>G                    | p.His241Gln                 | Mis         | Yes  | Tol  | Pos     | 1.7  | -     | 1           | -         | -      | -      |
| PDX1    | c.559G>A                    | p.Glu187Lys                 | Mis         | -    | Del  | Prob    | 5.9  | -     | 1           | -         | -      | -      |
| PDX1    | c.716C>A                    | p.Leu239Gln                 | Mis         | -    | Tol  | Benign  | 0.0  | Yes   | 2           | -         | -      | -      |

Supplementary Table 4: **List of variants identified in MODY patients.** Shown is the list of variants observed in the studied MODY patients; the columns are identical to those in Figure 2. The number of MODY patients (out of 250) observed to carry each variant is shown, as well as (for reference) the frequency of each variant in the unselected cohorts.

| Class                        | MODY patients | FHS cohort | JHS cohort | Extreme T2D cohort |           |                | P            |
|------------------------------|---------------|------------|------------|--------------------|-----------|----------------|--------------|
|                              |               |            |            | DM                 | No DM     | OR (95% CI)    |              |
| Low frequency non-synonymous | 120 (48%)     | 68 (4.4%)  | 97 (5.7%)  | 17 (4.7%)          | 6 (1.5%)  | 3.2 (1.2- 8.2) | <b>0.011</b> |
| Possibly Pathogenic          | 57 (23%)      | 8 (0.52%)  | 8 (0.47%)  | 4 (1.1%)           | 0 (0.0%)  | -              | <b>0.04</b>  |
| HGMD MODY                    | 69 (28%)      | 27 (1.8%)  | 25 (1.5%)  | 4 (1.1%)           | 1 (0.24%) | 4.7 (0.5-42.0) | 0.2          |
| Putative Pathogenic          | 48 (19%)      | 3 (0.19%)  | 1 (0.06%)  | 2 (0.55%)          | 0 (0.0%)  | -              | 0.25         |

Supplementary Table 5: **Carrier frequencies.** Shown is the fraction of individuals in each cohort, as well as MODY patients, who carry variants from each of the four variant classes. For the extreme T2D cohort, frequencies are shown separately for individuals with diabetes (DM) and individuals without diabetes (No DM). Based on these frequencies, we computed the odds ratio of carrier to non-carrier between extreme cases and controls, as well as the p-value from a one-sided test of association; these estimates control for potential ethnic differences between individuals from Finland and Sweden (Methods). The table shows 95% confidence intervals for odds ratios and shows p-values that exceed nominal ( $p < 0.05$ ) significance in bold. Odds ratios for the putative pathogenic or possibly pathogenic classes were not computed, as no controls carried variants.

| Phenotype       | Class           | FHS cohort |              |                |       | JHS cohort |              |               |      | Combined P   |
|-----------------|-----------------|------------|--------------|----------------|-------|------------|--------------|---------------|------|--------------|
|                 |                 | Indiv.     | w/ pheno (%) | OR (95% CI)    | P     | Indiv.     | w/ pheno (%) | OR (95% CI)   | P    |              |
| Diabetes        | Non-carrier     | 1473       | 101 (6.9%)   | -              | -     | 1594       | 327 (20.5%)  | -             | -    | -            |
|                 | Nonsyn < 1%     | 68         | 5 (7.3%)     | 1.1 (0.4- 2.7) | 0.51  | 97         | 19 (19.6%)   | 0.9 (0.6-1.6) | 0.61 | 0.53         |
|                 | Pos. Pathogenic | 8          | 1 (12.5%)    | 1.9 (0.2-15.9) | 0.42  | 8          | 1 (12.5%)    | 0.6 (0.1-4.5) | 0.84 | 0.71         |
|                 | HGMD MODY       | 27         | 2 (7.4%)     | 1.1 (0.3- 4.7) | 0.53  | 25         | 6 (24%)      | 1.2 (0.5-3.1) | 0.44 | 0.44         |
|                 | Put. Pathogenic | 3          | 1 (33.3%)    | 6.8 (0.6-75.5) | 0.22  | 1          | 1 (100%)     | -             | 0.21 | <b>0.049</b> |
| IFG or diabetes | Non-carrier     | 1401       | 487 (34.8%)  | -              | -     | 1547       | 541 (35%)    | -             | -    | -            |
|                 | Nonsyn < 1%     | 65         | 29 (44.6%)   | 1.5 (0.9- 2.5) | 0.058 | 93         | 28 (30.1%)   | 0.8 (0.5-1.3) | 0.86 | 0.41         |
|                 | Pos. Pathogenic | 8          | 4 (50.0%)    | 1.9 (0.5- 7.5) | 0.29  | 8          | 1 (12.5%)    | 0.3 (0.0-2.2) | 0.97 | 0.7          |
|                 | HGMD MODY       | 25         | 8 (32.0%)    | 0.9 (0.4- 2.1) | 0.7   | 25         | 8 (32.0%)    | 0.9 (0.4-2.0) | 0.7  | 0.74         |
|                 | Put. Pathogenic | 3          | 2 (66.7%)    | 3.8 (0.3-41.5) | 0.29  | 1          | 1 (100%)     | -             | 0.37 | 0.12         |

Supplementary Table 6: **Phenotypic impact of variants in unselected cohorts** Shown is the fraction of variant carriers in the two unselected cohorts with diabetes as well as the fraction with IFG or diabetes. Figure 2 shows data in graphical form.



| Gene           | Nucleotide change | Amino acid change | Pos. Pathogenic | HGMD MODY | Put. Pathogenic | DM Count | No DM Count |
|----------------|-------------------|-------------------|-----------------|-----------|-----------------|----------|-------------|
| <i>GCK</i>     | c.45+1G>T         | NA                | Yes             | Yes       | Yes             | 1        | 0           |
| <i>GCK</i>     | c.106C>T          | p.Arg36Trp        | No              | No        | No              | 1        | 0           |
| <i>GCK</i>     | c.493C>A          | p.Leu165Ile       | No              | No        | No              | 1        | 0           |
| <i>GCK</i>     | c.649G>A          | p.Asp217Asn       | No              | No        | No              | 0        | 1           |
| <i>HNF1A</i>   | c.392G>A          | p.Arg131Gln       | Yes             | Yes       | Yes             | 1        | 0           |
| <i>HNF1A</i>   | c.586A>G          | p.Thr196Ala       | No              | Yes       | No              | 0        | 1           |
| <i>HNF1A</i>   | c.341G>A          | p.Arg114His       | No              | No        | No              | 0        | 1           |
| <i>HNF1B</i>   | c.905A>G          | p.Asn302Ser       | No              | No        | No              | 1        | 0           |
| <i>HNF1B</i>   | c.1621A>C         | p.Ser541Arg       | No              | No        | No              | 1        | 0           |
| <i>HNF4A</i>   | c.488G>A          | p.Arg163Gln       | No              | Yes       | No              | 1        | 0           |
| <i>HNF4A</i>   | c.1333C>T         | p.Pro445Ser       | No              | Yes       | No              | 1        | 0           |
| <i>HNF4A</i>   | c.365G>T          | p.Arg122Leu       | Yes             | No        | No              | 1        | 0           |
| <i>HNF4A</i>   | c.655C>A          | p.Leu219Met       | No              | No        | No              | 1        | 0           |
| <i>HNF4A</i>   | c.1210G>A         | p.Val404Ile       | No              | No        | No              | 1        | 0           |
| <i>HNF4A</i>   | c.1360G>A         | p.Ala454Thr       | No              | No        | No              | 0        | 1           |
| <i>HNF4A</i>   | c.1387A>G         | p.Ile463Val       | No              | No        | No              | 0        | 1           |
| <i>INS</i>     | c.17G>A           | p.Arg6His         | No              | No        | No              | 1        | 1           |
| <i>INS</i>     | c.224G>A          | p.Gly75Asp        | No              | No        | No              | 1        | 0           |
| <i>NEUROD1</i> | c.117G>T          | p.Lys39Asn        | No              | No        | No              | 1        | 0           |
| <i>NEUROD1</i> | c.454delG         | p.Ala152LeufsX110 | Yes             | No        | No              | 1        | 0           |
| <i>PDX1</i>    | c.52T>C           | p.Cys18Arg        | No              | No        | No              | 2        | 0           |
| <i>PDX1</i>    | c.54C>A           | p.Cys18X          | No              | No        | No              | 1        | 0           |

Supplementary Table 7: **Variants observed in T2D cohort.** Shown is the list of variants observed in individuals within the T2D cohort. Indicated are the classes to which each variant belongs, as well as the number of observations in individuals with and without type 2 diabetes. One individual carried two variants (c.224G>A in *INS* and c.1621A>C in *HNF1B*); thus the total number of counts is one greater than presented Supplementary Table 5.

| Gene           | Class           | Diabetes   |              |                  |      |            |              |                |      |              |
|----------------|-----------------|------------|--------------|------------------|------|------------|--------------|----------------|------|--------------|
|                |                 | FHS cohort |              |                  |      | JHS cohort |              |                |      | Combined P   |
|                |                 | Indiv.     | w/ pheno (%) | OR (95% CI)      | P    | Indiv.     | w/ pheno (%) | OR (95% CI)    | P    |              |
| -              | Non-carrier     | 1473       | 101 (6.9%)   | -                | -    | 1594       | 327 (20.5%)  | -              | -    | -            |
| <i>GCK</i>     | Nonsyn < 1%     | 5          | 0 (0.0%)     | -                | 1.   | 8          | 2 (25.0%)    | 1.3 (0.3- 6.5) | 0.44 | 0.46         |
| <i>GCK</i>     | Pos. Pathogenic | 1          | 0 (0.0%)     | -                | 1.   | 1          | 0 (0.0%)     | -              | 1.   | 1.           |
| <i>GCK</i>     | HGMD MODY       | 1          | 0 (0.0%)     | -                | 1.   | 1          | 0 (0.0%)     | -              | 1.   | 1.           |
| <i>GCK</i>     | Put. Pathogenic | 0          | 0 (0.0%)     | -                | 1.   | 0          | 0 (0.0%)     | -              | 1.   | 1.           |
| <i>HNF1A</i>   | Nonsyn < 1%     | 24         | 2 (8.3%)     | 1.2 (0.3- 5.3)   | 0.51 | 26         | 8 (30.8%)    | 1.7 (0.8- 4.0) | 0.18 | 0.18         |
| <i>HNF1A</i>   | Pos. Pathogenic | 3          | 1 (33.3%)    | 6.8 (0.6- 75.5)  | 0.19 | 2          | 1 (50.0%)    | 3.9 (0.2-62.9) | 0.38 | 0.11         |
| <i>HNF1A</i>   | HGMD MODY       | 14         | 1 (7.1%)     | 1.0 (0.1- 8.1)   | 0.65 | 21         | 6 (28.6%)    | 1.6 (0.6- 4.1) | 0.28 | 0.26         |
| <i>HNF1A</i>   | Put. Pathogenic | 2          | 1 (50.0%)    | 13.6 (0.8-218.8) | 0.15 | 1          | 1 (100.0%)   | -              | 0.2  | <b>0.031</b> |
| <i>HNF1B</i>   | Nonsyn < 1%     | 15         | 1 (6.7%)     | 1.0 (0.1- 7.4)   | 0.62 | 14         | 3 (21.4%)    | 1.1 (0.3- 3.8) | 0.58 | 0.58         |
| <i>HNF1B</i>   | Pos. Pathogenic | 2          | 0 (0.0%)     | -                | 1.   | 2          | 0 (0.0%)     | -              | 1.   | 1.           |
| <i>HNF1B</i>   | HGMD MODY       | 8          | 1 (12.5%)    | 1.9 (0.2- 15.9)  | 0.42 | 4          | 1 (25.0%)    | 1.3 (0.1-12.5) | 0.6  | 0.4          |
| <i>HNF1B</i>   | Put. Pathogenic | 0          | 0 (0.0%)     | -                | 1.   | 0          | 0 (0.0%)     | -              | 1.   | 1.           |
| <i>HNF4A</i>   | Nonsyn < 1%     | 9          | 1 (11.1%)    | 1.7 (0.2- 13.7)  | 0.5  | 9          | 1 (11.1%)    | 0.5 (0.1- 3.9) | 0.89 | 0.79         |
| <i>HNF4A</i>   | Pos. Pathogenic | 1          | 0 (0.0%)     | -                | 1.   | 1          | 0 (0.0%)     | -              | 1.   | 1.           |
| <i>HNF4A</i>   | HGMD MODY       | 4          | 0 (0.0%)     | -                | 1.   | 0          | 0 (0.0%)     | -              | 1.   | 1.           |
| <i>HNF4A</i>   | Put. Pathogenic | 1          | 0 (0.0%)     | -                | 1.   | 0          | 0 (0.0%)     | -              | 1.   | 1.           |
| <i>INS</i>     | Nonsyn < 1%     | 4          | 0 (0.0%)     | -                | 1.   | 15         | 0 (0.0%)     | -              | 1.   | 1.           |
| <i>INS</i>     | Pos. Pathogenic | 0          | 0 (0.0%)     | -                | 1.   | 0          | 0 (0.0%)     | -              | 1.   | 1.           |
| <i>INS</i>     | HGMD MODY       | 0          | 0 (0.0%)     | -                | 1.   | 0          | 0 (0.0%)     | -              | 1.   | 1.           |
| <i>INS</i>     | Put. Pathogenic | 0          | 0 (0.0%)     | -                | 1.   | 0          | 0 (0.0%)     | -              | 1.   | 1.           |
| <i>NEUROD1</i> | Nonsyn < 1%     | 3          | 1 (33.3%)    | 6.8 (0.6- 75.9)  | 0.12 | 15         | 2 (13.3%)    | 0.6 (0.1- 2.7) | 0.82 | 0.63         |
| <i>NEUROD1</i> | Pos. Pathogenic | 0          | 0 (0.0%)     | -                | 1.   | 2          | 0 (0.0%)     | -              | 1.   | 1.           |
| <i>NEUROD1</i> | HGMD MODY       | 0          | 0 (0.0%)     | -                | 1.   | 0          | 0 (0.0%)     | -              | 1.   | 1.           |
| <i>NEUROD1</i> | Put. Pathogenic | 0          | 0 (0.0%)     | -                | 1.   | 0          | 0 (0.0%)     | -              | 1.   | 1.           |
| <i>PDX1</i>    | Nonsyn < 1%     | 10         | 1 (10.0%)    | 1.5 (0.2- 12.0)  | 0.54 | 12         | 4 (33.3%)    | 2.0 (0.6- 6.5) | 0.23 | 0.21         |
| <i>PDX1</i>    | Pos. Pathogenic | 1          | 0 (0.0%)     | -                | 1.   | 0          | 0 (0.0%)     | -              | 1.   | 1.           |
| <i>PDX1</i>    | HGMD MODY       | 0          | 0 (0.0%)     | -                | 1.   | 0          | 0 (0.0%)     | -              | 1.   | 1.           |
| <i>PDX1</i>    | Put. Pathogenic | 0          | 0 (0.0%)     | -                | 1.   | 0          | 0 (0.0%)     | -              | 1.   | 1.           |

Supplementary Table 8: **Impact of variants on diabetes risk in unselected cohorts.** In addition to investigating phenotypic effects across all genes collectively, we estimated variant odds ratios (OR) and association statistics for each gene individually. Shown are columns analogous to those in Figure 2 that measure effect on diabetes, but with separate rows for each gene. Effects on impaired fasting glucose (IFG) or diabetes are shown in Supplementary Table 9. As some individuals carried multiple variants, the sum of carrier numbers across genes is greater than that in Figure 2.

| Gene           | Class           | IFG or diabetes |              |                |      |            |              |                |      |       | Combined P |
|----------------|-----------------|-----------------|--------------|----------------|------|------------|--------------|----------------|------|-------|------------|
|                |                 | FHS cohort      |              |                |      | JHS cohort |              |                |      |       |            |
|                |                 | Indiv.          | w/ pheno (%) | OR (95% CI)    | P    | Indiv.     | w/ pheno (%) | OR (95% CI)    | P    |       |            |
| -              | Non-carrier     | 1401            | 487 (34.8%)  | -              | -    | 1547       | 541 (35.%)   | -              | -    | -     |            |
| <i>GCK</i>     | Nonsyn < 1%     | 5               | 3 (60.%)     | 2.8 (0.5-16.6) | 0.24 | 7          | 4 (57.1%)    | 2.5 (0.6-11.3) | 0.19 | 0.092 |            |
| <i>GCK</i>     | Pos. Pathogenic | 1               | 1 (100.%)    | -              | 0.36 | 1          | 0 (0.%)      | -              | 1.   | 0.33  |            |
| <i>GCK</i>     | HGMD MODY       | 1               | 0 (0.%)      | -              | 1.   | 1          | 1 (100.%)    | -              | 0.34 | 0.59  |            |
| <i>GCK</i>     | Put. Pathogenic | 0               | 0 (0.%)      | -              | 1.   | 0          | 0 (0.%)      | -              | 1.   | 1.    |            |
| <i>HNF1A</i>   | Nonsyn < 1%     | 23              | 9 (39.1%)    | 1.2 (0.5- 2.8) | 0.42 | 26         | 8 (30.8%)    | 0.8 (0.4- 1.9) | 0.74 | 0.57  |            |
| <i>HNF1A</i>   | Pos. Pathogenic | 3               | 2 (66.7%)    | 3.7 (0.3-40.8) | 0.29 | 2          | 1 (50.%)     | 1.9 (0.1-30.1) | 0.57 | 0.24  |            |
| <i>HNF1A</i>   | HGMD MODY       | 13              | 4 (30.8%)    | 0.8 (0.3- 2.7) | 0.72 | 21         | 6 (28.6%)    | 0.8 (0.3- 1.9) | 0.82 | 0.79  |            |
| <i>HNF1A</i>   | Put. Pathogenic | 2               | 1 (50.%)     | 1.8 (0.1-29.6) | 0.57 | 1          | 1 (100.%)    | -              | 0.33 | 0.28  |            |
| <i>HNF1B</i>   | Nonsyn < 1%     | 14              | 5 (35.7%)    | 1.0 (0.3- 3.1) | 0.59 | 14         | 4 (28.6%)    | 0.8 (0.2- 2.4) | 0.75 | 0.65  |            |
| <i>HNF1B</i>   | Pos. Pathogenic | 2               | 0 (0.%)      | -              | 1.   | 2          | 0 (0.%)      | -              | 1.   | 1.    |            |
| <i>HNF1B</i>   | HGMD MODY       | 7               | 2 (28.6%)    | 0.7 (0.1- 3.8) | 0.79 | 4          | 2 (50.%)     | 1.9 (0.3-13.4) | 0.41 | 0.59  |            |
| <i>HNF1B</i>   | Put. Pathogenic | 0               | 0 (0.%)      | -              | 1.   | 0          | 0 (0.%)      | -              | 1.   | 1.    |            |
| <i>HNF4A</i>   | Nonsyn < 1%     | 9               | 3 (33.3%)    | 0.9 (0.2- 3.7) | 0.66 | 9          | 2 (22.2%)    | 0.5 (0.1- 2.6) | 0.9  | 0.8   |            |
| <i>HNF4A</i>   | Pos. Pathogenic | 1               | 1 (100.%)    | -              | 0.37 | 1          | 0 (0.%)      | -              | 1.   | 0.55  |            |
| <i>HNF4A</i>   | HGMD MODY       | 4               | 2 (50.%)     | 1.8 (0.3-13.1) | 0.42 | 0          | 0 (0.%)      | -              | 1.   | 0.44  |            |
| <i>HNF4A</i>   | Put. Pathogenic | 1               | 1 (100.%)    | -              | 0.34 | 0          | 0 (0.%)      | -              | 1.   | 0.37  |            |
| <i>INS</i>     | Nonsyn < 1%     | 4               | 3 (75.%)     | 5.5 (0.6-53.5) | 0.13 | 13         | 1 (7.7%)     | 0.2 (0.0- 1.2) | 1.   | 0.91  |            |
| <i>INS</i>     | Pos. Pathogenic | 0               | 0 (0.%)      | -              | 1.   | 0          | 0 (0.%)      | -              | 1.   | 1.    |            |
| <i>INS</i>     | HGMD MODY       | 0               | 0 (0.%)      | -              | 1.   | 0          | 0 (0.%)      | -              | 1.   | 1.    |            |
| <i>INS</i>     | Put. Pathogenic | 0               | 0 (0.%)      | -              | 1.   | 0          | 0 (0.%)      | -              | 1.   | 1.    |            |
| <i>NEUROD1</i> | Nonsyn < 1%     | 2               | 1 (50.%)     | 1.8 (0.1-29.5) | 0.6  | 14         | 5 (35.7%)    | 1.0 (0.3- 3.1) | 0.55 | 0.49  |            |
| <i>NEUROD1</i> | Pos. Pathogenic | 0               | 0 (0.%)      | -              | 1.   | 2          | 0 (0.%)      | -              | 1.   | 1.    |            |
| <i>NEUROD1</i> | HGMD MODY       | 0               | 0 (0.%)      | -              | 1.   | 0          | 0 (0.%)      | -              | 1.   | 1.    |            |
| <i>NEUROD1</i> | Put. Pathogenic | 0               | 0 (0.%)      | -              | 1.   | 0          | 0 (0.%)      | -              | 1.   | 1.    |            |
| <i>PDX1</i>    | Nonsyn < 1%     | 10              | 6 (60.%)     | 2.8 (0.8- 9.9) | 0.1  | 12         | 5 (41.7%)    | 1.3 (0.4- 4.3) | 0.43 | 0.11  |            |
| <i>PDX1</i>    | Pos. Pathogenic | 1               | 0 (0.%)      | -              | 1.   | 0          | 0 (0.%)      | -              | 1.   | 1.    |            |
| <i>PDX1</i>    | HGMD MODY       | 0               | 0 (0.%)      | -              | 1.   | 0          | 0 (0.%)      | -              | 1.   | 1.    |            |
| <i>PDX1</i>    | Put. Pathogenic | 0               | 0 (0.%)      | -              | 1.   | 0          | 0 (0.%)      | -              | 1.   | 1.    |            |

Supplementary Table 9: **Impact of variants on impaired fasting glucose risk in unselected cohorts.** In addition to investigating phenotypic effects across all genes collectively, we estimated variant odds ratios (OR) and association statistics for each gene individually. Shown are columns analogous to those in Figure 2 that measure effect on impaired fasting glucose (IFG), but with separate rows for each gene. Effects on diabetes are shown in Supplementary Table 8. The number of analyzed individuals is smaller for IFG than T2D because not all studied individuals had glucose measurements available.

| Phenotype                        | Class           | FHS cohort |              |                |      | JHS cohort |              |                |      | Combined P |
|----------------------------------|-----------------|------------|--------------|----------------|------|------------|--------------|----------------|------|------------|
|                                  |                 | Indiv.     | w/ pheno (%) | OR (95% CI)    | P    | Indiv.     | w/ pheno (%) | OR (95% CI)    | P    |            |
| Diabetes                         | Non-carrier     | 1536       | 106 (6.9%)   | -              | -    | 1683       | 344 (20.4%)  | -              | -    | -          |
|                                  | Nonsyn < 1%     | 5          | 0 (0.%)      | -              | 1.   | 8          | 2 (25.%)     | 1.3 (0.3- 6.5) | 0.44 | 0.48       |
|                                  | Pos. Pathogenic | 1          | 0 (0.%)      | -              | 1.   | 1          | 0 (0.%)      | -              | 1.   | 1.         |
|                                  | HGMD MODY       | 1          | 0 (0.%)      | -              | 1.   | 1          | 0 (0.%)      | -              | 1.   | 1.         |
|                                  | Put. Pathogenic | 0          | 0 (0.%)      | -              | 1.   | 0          | 0 (0.%)      | -              | 1.   | 1.         |
| IFG, diabetes, or FPG > 99 mg/dL | Non-carrier     | 1461       | 513 (35.1%)  | -              | -    | 1633       | 599 (36.7%)  | -              | -    | -          |
|                                  | Nonsyn < 1%     | 5          | 3 (60.%)     | 2.8 (0.5-16.6) | 0.27 | 7          | 5 (71.4%)    | 4.3 (0.8-22.3) | 0.11 | 0.054      |
|                                  | Pos. Pathogenic | 1          | 1 (100.%)    | -              | 0.36 | 1          | 0 (0.%)      | -              | 1.   | 0.6        |
|                                  | HGMD MODY       | 1          | 0 (0.%)      | -              | 1.   | 1          | 1 (100.%)    | -              | 0.34 | 0.65       |
|                                  | Put. Pathogenic | 0          | 0 (0.%)      | -              | 1.   | 0          | 0 (0.%)      | -              | 1.   | 1.         |

Supplementary Table 10: **Phenotypes of *GCK*-variant carriers.** *GCK*-MODY patients have a distinctly mild elevation in fasting plasma glucose levels (99-144 mg/dL). The table contains tabulated data from the graph in Figure 3a. Two additional variants are included in the table, as carriers of these variants have diabetes and are thus not plotted in Figure 3a.
